# Supplementary material
Source: PubMed Central journal article supplement (PMC2593908)

# An Efficient and General Approach to $\beta$ -Functionalized Ketones

Jingliang Jiao, Larry X. Nguyen, Dennis R. Patterson, and Robert A. Flowers, II\*

*Department of Chemistry, Lehigh University, Bethlehem PA 18015, USA*

## Supporting Information

| <b>List of Contents</b>                                                                             | <b>page number</b> |
|-----------------------------------------------------------------------------------------------------|--------------------|
| Materials and general methods                                                                       | S2                 |
| Representative procedure for the synthesis of cyclopropanols via the Kulinkovich reaction           | S2                 |
| General procedure for the synthesis of 2-Ethyl-1-phenylcyclopropanol ( <b>5</b> )                   | S3                 |
| General procedure for the synthesis of Bicyclo[4.1.0]heptan-1-ol ( <b>8</b> )                       | S3                 |
| General procedure for the preparation of (Bicyclo[4.1.0]hept-1-yloxy)-trimethylsilane ( <b>10</b> ) | S4                 |
| Representative procedure for the synthesis of $\beta$ -functionalized ketones using CAN             | S4                 |
| Spectral data for the starting materials and products                                               | S5-S15             |
| References                                                                                          | S15                |
| <sup>1</sup> H and <sup>13</sup> C NMR spectra of compound <b>3a</b>                                | S16                |
| <sup>1</sup> H and <sup>13</sup> C NMR spectra of compound <b>3b</b>                                | S17                |
| <sup>1</sup> H and <sup>13</sup> C NMR spectra of compound <b>6a</b>                                | S18                |
| <sup>1</sup> H and <sup>13</sup> C NMR spectra of compound <b>6b</b>                                | S19                |
| <sup>1</sup> H and <sup>13</sup> C NMR spectra of compound <b>6c</b>                                | S20                |
| <sup>1</sup> H and <sup>13</sup> C NMR spectra of compound <b>9a</b>                                | S21                |
| <sup>1</sup> H and <sup>13</sup> C NMR spectra of compound <b>9c</b>                                | S22                |
| <sup>1</sup> H NMR spectra of known compounds                                                       | S23-S33            |

## **Materials and general methods**

All solvents were distilled before use. All cyclopropyl alcohols were prepared using the Kulinkovich reaction.<sup>1</sup> All the other compounds were purchased from Aldrich or Acros, and were used without further purification.

<sup>1</sup>H and <sup>13</sup>C NMR spectra were recorded on a Bruker 500 MHz spectrometer. Mass spectra were obtained using a HP 5890 series GC-MS instrument. GC-MS method: initial temp.: 50 °C (hold for 3 min), rate: 15 °C/min, final temp.: 280 °C (hold for 7 min). Column chromatography was performed using 65-250 mesh silica gel.

Yields reported in the supporting information refer to a single experiment. Known compounds were characterized by comparing their <sup>1</sup>H NMR spectra to the previously reported data. Their purity was confirmed by NMR analysis with a copy of <sup>1</sup>H NMR spectrum included. Previously unknown compounds were synthesized, purified, analyzed from a single run. They were characterized by <sup>1</sup>H NMR, <sup>13</sup>C NMR, MS, and HRMS. HRMS were performed by the Mass Spectrometry Facility at the University of Notre Dame, IN. For all of the unknown compounds, a copy of their <sup>1</sup>H NMR and <sup>13</sup>C NMR spectra is included.

### **Representative procedure for the synthesis of cyclopropanols via the Kulinkovich reaction**

In a fume hood, 14 mmol of ethylmagnesium chloride in THF was added dropwise over 30 minutes at room temperature to a solution of 5 mmol of ester and 7 mmol of titanium tetrakisopropoxide in THF. The reaction was allowed to stand while stirring overnight. Then the solution was quenched with distilled water and stirred while still in the fume hood. A precipitate was formed and the solution was filtered. After filtration, the solution was extracted with 3 x 30 mL of diethyl ether, washed with

distilled water, and dried over  $\text{MgSO}_4$  followed by filtration and concentration. The organic residue was subjected to column chromatography to afford the cyclopropanols **1-4**.

#### General procedure for the synthesis of 2-Ethyl-1-phenylcyclopropanol (**5**)

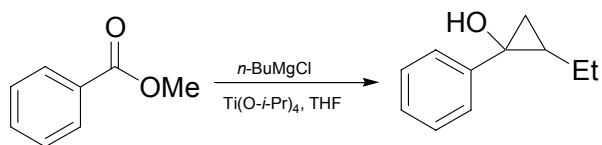

In a fume hood, 14 mmol of *n*-butylmagnesium chloride in THF was added dropwise over 30 minutes at room temperature to a solution of 5 mmol of ester and 7 mmol of titanium tetrakisopropoxide in THF. The reaction was allowed to stand while stirring overnight. Then the solution was quenched with distilled water and stirred while still in the fume hood. A precipitate was formed and the solution was then filtered. After the filtration, the solution was extracted with 3 x 30 mL of diethyl ether, washed with distilled water, and dried over  $\text{MgSO}_4$  followed by filtration and concentration. Then the organic residue was subjected to column chromatography to afford compound **5**.

#### General procedure for the synthesis of Bicyclo[4.1.0]heptan-1-ol (**8**)

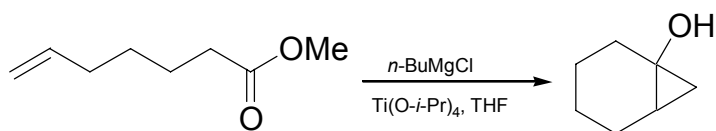

To a solution of methyl 6-heptenoate (10 mmol) in 10 mL of THF was added  $\text{Ti(O-}i\text{-Pr)}_4$  (10 mmol). *n*-Butylmagnesium chloride (50 mmol, 25 mL of 2.0 M solution in THF) was added at room temperature over a period of 1 h. The reaction mixture was stirred for overnight and quenched with distilled water. A precipitate was formed and the solution was then filtered. After the filtration, the solution was extracted with 3 x 30 mL of diethyl ether, washed with distilled water, and dried over  $\text{MgSO}_4$  followed by filtration

and concentration. Then the organic residue was subjected to column chromatography to afford compound **8**.

**General procedure for the preparation of (Bicyclo[4.1.0]hept-1-yloxy)-trimethylsilane (**10**)**

To a stirred solution of trimethyl silyl enol ether (5 mmol) in toluene (12 mL) at 0°C was added diethyl zinc (10.2 mL, 1 M, 10.2 mmol) and then diiodomethane (0.82 mL, 10.2 mmol). The white suspension was allowed to warm to room temperature and stirred for 16 hours before the addition of pyridine (1.65 mL, 20.4 mmol). After 25 minutes the reaction mixture was poured onto petroleum ether (100 mL). The aqueous layer was extracted with petroleum ether (2x 50 mL). The combined organic extract was washed with brine and dried with anhydrous MgSO<sub>4</sub>, followed by filtration and removal of solvent with rotary evaporation. The crude products were purified with column chromatography using silica gel as stationary phase and 9:1 Hexane/Et<sub>2</sub>O as mobile phase.

**Representative procedure for the synthesis of β-functionalized ketones using CAN**

Organic solvent (MeOH, MeCN, or CH<sub>2</sub>Cl<sub>2</sub>) was added to 1.0 mmol of cyclopropanol (or **10**) in a round bottom flask containing a magnetic stir bar. Next, a solution of 1.0 mmol of the ionic substrate that contains the desired anion was made using water or methanol depending on the reaction conditions needed. This ionic solution was poured into the flask. In a separate reaction vessel, a solution of 2.0 mmol of CAN in an appropriate solvent (MeOH, MeCN, or H<sub>2</sub>O) was prepared. Under nitrogen atmosphere and constant stirring of the cyclopropanol and ionic solution mixture, the CAN solution was added dropwise. The reaction was run for 30 minutes, and was worked up by removing the organic solvent via rotary evaporation. Distilled water (30 mL) was poured into the flask and the solution was extracted with 3 x 30 mL of diethyl

ether, washed with distilled water, and dried over MgSO<sub>4</sub> followed by filtration and concentration. The organic residue was subjected to column chromatography to afford the products. All of the β-substituted ketones are prone to decomposition in neat form, so they are kept in CDCl<sub>3</sub> as a solution.

### **Spectral data for the starting materials and products**

**1-Phenyl-cyclopropanol (1)**<sup>2</sup>: The representative procedure was followed using methyl benzoate (0.68 g, 5 mmol), titanium tetraisopropoxide (2 g, 7 mmol), and EtMgCl (7 mL of 2 M solution, 14 mmol) employing THF as solvent. The reaction was run overnight at room temperature. Chromatographic purification (Hexane/ethyl acetate) provided 0.52 g of compound **1** as a yellow liquid (78%). <sup>1</sup>H NMR (500MHz, CDCl<sub>3</sub>): δ 7.34-7.30 (m, 5H); 2.29 (s, 1H); 1.25 (m, 2H); 1.03 (m, 2H). A copy of the <sup>1</sup>H NMR spectrum can be found at the end of this document to confirm the compound's purity.

**1-(4-Methoxy-phenyl)-cyclopropanol (2)**: The representative procedure was followed using methyl 4-methoxybenzoate (0.83 g, 5 mmol), titanium tetraisopropoxide (2 g, 7 mmol), and EtMgCl (7 mL of 2 M solution, 14 mmol) employing THF as solvent. The reaction was run overnight at room temperature. Chromatographic purification (Hexane/ethyl acetate) provided 0.62 g of compound **2** as a yellow liquid (75%). <sup>1</sup>H NMR (500MHz, CDCl<sub>3</sub>): δ 7.25-6.83 (m, 4H); 3.77 (s, 3H); 2.51 (s, 1H); 1.17 (m, 2H); 0.94 (m, 2H). Registry number: 15973-65-6. A copy of the <sup>1</sup>H NMR spectrum can be found at the end of this document to confirm the compound's purity.

**1-Cyclohexylcyclopropanol (3)**<sup>3</sup>: The representative procedure was followed using methyl cyclohexanecarboxylate (0.71 g, 5 mmol), titanium tetraisopropoxide (2 g, 7 mmol), and EtMgCl (7 mL of 2 M solution, 14 mmol) employing THF as solvent. The

reaction was run overnight at room temperature. Chromatographic purification (Hexane/ethyl acetate) provided 0.57 g of compound **3** as a yellow liquid (82%). <sup>1</sup>H NMR (500MHz, CDCl<sub>3</sub>): δ 1.93 (s, 1H); 1.76-1.11 (m, 11H); 0.65 (m, 2H); 0.40 (m, 2H). A copy of the <sup>1</sup>H NMR spectrum can be found at the end of this document to confirm the compound's purity.

**1-Methyl-cyclopropanol (4)**: The representative procedure was followed using ethyl acetate (0.44 g, 5 mmol), titanium tetraisopropoxide (2 g, 7 mmol), and EtMgCl (7 mL of 2 M solution, 14 mmol) employing THF as solvent. The reaction was run overnight at room temperature. Chromatographic purification (Hexane/ethyl acetate) provided 0.23 g of compound **4** as a yellow liquid (63%). <sup>1</sup>H NMR (500MHz, CDCl<sub>3</sub>): δ 1.82 (s, 1H); 1.21 (s, 3H); 0.62 (m, 2H); 0.41 (m, 2H). Registry number: 29526-99-6. A copy of the <sup>1</sup>H NMR spectrum can be found at the end of this document to confirm the compound's purity.

**2-Ethyl-1-phenylcyclopropanol (5)**<sup>4</sup>: The representative procedure was followed using methyl benzoate (0.68 g, 5 mmol), titanium tetraisopropoxide (2 g, 7 mmol), and *n*-BuMgCl (7 mL of 2 M solution, 14 mmol) employing THF as solvent. The reaction was run overnight at room temperature. Chromatographic purification (Hexane/ethyl acetate) provided 0.57 g of compound **5** as a yellow liquid (70%, diastereomeric mixture). <sup>1</sup>H NMR (500MHz, CDCl<sub>3</sub>): (*trans* isomer) δ 7.40–7.20 (m, 5H); 2.56 (bs, 1H); 1.38–1.26 (m, 1H); 1.15–1.03 (m, 1H); 1.05 (dd, *J* = 5.7, 10.2 Hz, 1H); 0.86 (dd, *J* = 5.7, 12.3 Hz, 1H); 0.82–0.72 (m, 4H). A copy of the <sup>1</sup>H NMR spectrum can be found at the end of this document to confirm the compound's purity.

**Bicyclo[4.1.0]heptan-1-ol (8)**<sup>5</sup>: The general procedure was followed using methyl 6-heptenoate (1.42 g, 10 mmol), titanium tetraisopropoxide (2.9 g, 10 mmol), and *n*-BuMgCl (25 mL of 2.0 M solution in THF, 50 mmol) employing THF as solvent. The reaction was run overnight at room temperature. Chromatographic purification (Hexane/ethyl acetate) provided 0.81 g of compound **8** as a yellow oil (72%). <sup>1</sup>H NMR (500MHz, CDCl<sub>3</sub>): δ 2.18-1.07 (m, 10H); 0.85 (m, 1H); 0.37 (m, 1H). A copy of the <sup>1</sup>H NMR spectrum can be found at the end of this document to confirm the compound's purity.

**(Bicyclo[4.1.0]hept-1-yloxy)-trimethylsilane (10)**<sup>6</sup>: The general procedure was followed using (cyclohexenyloxy)trimethylsilane (0.85 g, 5 mmol), diethyl zinc (10.2 mL of 1 M solution, 10.2 mmol), diiodomethane (0.82 mL, 10.2 mmol), and pyridine (1.65 mL, 20.4 mmol) with toluene as solvent. The reaction was run for 16 hours at 0 °C with warming to room temperature. Chromatographic purification (Hexane/diethyl ether) provided 0.83 g of compound **10** as a yellow oil (69%). <sup>1</sup>H NMR (500MHz, CDCl<sub>3</sub>) δ 2.14-2.08 (m, 1H); 1.98-1.86 (m, 2H); 1.45-1.34 (m, 2H); 1.20-1.02 (m, 4H); 0.74-0.20 (m, 2H); 0.09 (s, 9H). A copy of the <sup>1</sup>H NMR spectrum can be found at the end of this document to confirm the compound's purity.

**3-Azido-1-phenyl-1-propanone (1a)**<sup>7</sup>: The representative procedure was followed using **1** (134 mg, 1 mmol), NaN<sub>3</sub> (65 mg, 1 mmol), and CAN (1.1 g, 2 mmol) with CH<sub>3</sub>CN-H<sub>2</sub>O(20%) as solvent. The reaction was run for 30 minutes at room temperature. Chromatographic purification (Hexane/ethyl acetate) provided 135 mg of compound **1a** as a yellow liquid (77%). <sup>1</sup>H NMR (500MHz, CDCl<sub>3</sub>): δ 7.98-7.47 (m, 5H);

3.72 (t,  $J = 6.5$  Hz, 2H); 3.23 (t,  $J = 6.5$  Hz, 2H). A copy of the  $^1\text{H}$  NMR spectrum can be found at the end of this document to confirm the compound's purity.

**3-Azido-1-(4-methoxy-phenyl)-1-propanone (2a)**<sup>7</sup>: The representative procedure was followed using **2** (164 mg, 1 mmol),  $\text{NaN}_3$  (65 mg, 1 mmol), and CAN (1.1 g, 2 mmol) with  $\text{CH}_3\text{CN-H}_2\text{O}$ (20%) as solvent. The reaction was run for 30 minutes at room temperature. Chromatographic purification (Hexane/ethyl acetate) provided 170 mg of compound **2a** as a yellow liquid (83%).  $^1\text{H}$  NMR (500MHz,  $\text{CDCl}_3$ ):  $\delta$  7.92-6.90 (m, 4H); 3.84 (s, 3H); 3.68 (t,  $J = 6.5$  Hz, 2H); 3.14 (t,  $J = 6.5$  Hz, 2H). A copy of the  $^1\text{H}$  NMR spectrum can be found at the end of this document to confirm the compound's purity.

**3-Azido-1-cyclohexyl-1-propanone (3a)**: The representative procedure was followed using **3** (140 mg, 1 mmol),  $\text{NaN}_3$  (65 mg, 1 mmol), and CAN (1.1 g, 2 mmol) with  $\text{CH}_3\text{CN-H}_2\text{O}$ (20%) as solvent. The reaction was run for 30 minutes at room temperature. Chromatographic purification (Hexane/ethyl acetate) provided 129 mg of compound **3a** as a yellow liquid (71%).  $^1\text{H}$  NMR (500MHz,  $\text{CDCl}_3$ ):  $\delta$  3.50 (t,  $J = 6.4$  Hz, 2H); 2.67 (t,  $J = 6.4$  Hz, 2H); 2.32 (m, 1H); 1.81-1.22 (m, 10H).  $^{13}\text{C}$  NMR (125MHz,  $\text{CDCl}_3$ ):  $\delta$  210.6; 59.9; 50.4; 45.4; 39.9; 38.8; 28.0; 27.8; 25.4. GC-MS:  $m/z$  (rel int) 181 ( $\text{M}^+$ , 1); 126 (8); 111 (16); 83 (100); 55 (91). FAB-HRMS calcd for  $\text{C}_9\text{H}_{16}\text{ON}_3$  ( $\text{M}+\text{H}$ )<sup>+</sup>: 182.1293, found: 182.1281.

**4-Azido-2-butanone (4a)**: The representative procedure was followed using **4** (72 mg, 1 mmol),  $\text{NaN}_3$  (65 mg, 1 mmol), and CAN (1.1 g, 2 mmol) with  $\text{CH}_3\text{CN-H}_2\text{O}$ (20%) as solvent. The reaction was run for 30 minutes at room temperature. Chromatographic purification (Hexane/ethyl acetate) provided 79 mg of compound **4a** as a yellow liquid



(70%).  $^1\text{H}$  NMR (500MHz,  $\text{CDCl}_3$ ):  $\delta$  3.48 (t,  $J = 6.4$  Hz, 2H); 2.64 (t,  $J = 6.4$  Hz, 2H); 2.01 (s, 3H). Registry number: 193401-62-6. A copy of the  $^1\text{H}$  NMR spectrum can be found at the end of this document to confirm the compound's purity.

**1-Phenyl-3-thiocyanato-1-propanone (1b)**: The representative procedure was followed using **1** (134 mg, 1 mmol),  $\text{NH}_4\text{SCN}$  (76 mg, 1 mmol), and CAN (1.1 g, 2 mmol) with  $\text{CH}_3\text{CN}$  as solvent. The reaction was run for 30 minutes at room temperature. Chromatographic purification (Hexane/ethyl acetate) provided 166 mg of compound **1b** as a yellow liquid (87%).  $^1\text{H}$  NMR (500MHz,  $\text{CDCl}_3$ ):  $\delta$  7.96-7.47 (m, 5H); 3.53 (t,  $J = 6.5$  Hz, 2H); 3.31 (t,  $J = 6.5$  Hz, 2H). Registry number: 16006-57-8. A copy of the  $^1\text{H}$  NMR spectrum can be found at the end of this document to confirm the compound's purity.

**1-(4-Methoxy-phenyl)-3-thiocyanato-1-propanone (2b)**: The representative procedure was followed using **2** (164 mg, 1 mmol),  $\text{NH}_4\text{SCN}$  (76 mg, 1 mmol), and CAN (1.1 g, 2 mmol) with  $\text{CH}_3\text{CN}$  as solvent. The reaction was run for 30 minutes at room temperature. Chromatographic purification (Hexane/ethyl acetate) provided 197 mg of compound **2b** as a yellow liquid (89%).  $^1\text{H}$  NMR (500MHz,  $\text{CDCl}_3$ ):  $\delta$  7.93-6.89 (m, 4H); 3.85 (s, 3H); 3.46 (t,  $J = 6.5$  Hz, 2H); 3.30 (t,  $J = 6.5$  Hz, 2H). Registry number: 70018-94-9. A copy of the  $^1\text{H}$  NMR spectrum can be found at the end of this document to confirm the compound's purity.

**1-Cyclohexyl-3-thiocyanato-1-propanone (3b)**: The representative procedure was followed using **3** (140 mg, 1 mmol),  $\text{NH}_4\text{SCN}$  (76 mg, 1 mmol), and CAN (1.1 g, 2 mmol) with  $\text{CH}_3\text{CN}$  as solvent. The reaction was run for 30 minutes at room temperature. Chromatographic purification (Hexane/ethyl acetate) provided 177 mg of compound **3b**

as a yellow liquid (90%).  $^1\text{H}$  NMR (500MHz,  $\text{CDCl}_3$ ):  $\delta$  3.12 (t,  $J = 6.5$  Hz, 2H); 2.98 (t,  $J = 6.5$  Hz, 2H); 2.36 (m, 1H); 1.87-1.18 (m, 10H).  $^{13}\text{C}$  NMR (125MHz,  $\text{CDCl}_3$ ):  $\delta$  209.8; 50.3; 39.4; 30.7; 29.2; 27.8; 27.5; 25.2; 25.0. GC-MS:  $m/z$  (rel int) 197 ( $\text{M}^+$ , 1); 111 (35); 82 (100); 54 (70). FAB-HRMS calcd for  $\text{C}_{10}\text{H}_{16}\text{ONS}$  ( $\text{M}+\text{H}$ ) $^+$ : 198.0953, found: 198.0932.

**4-Thiocyanato-2-butanone (4b)**: The representative procedure was followed using **4** (72 mg, 1 mmol),  $\text{NH}_4\text{SCN}$  (76 mg, 1 mmol), and CAN (1.1 g, 2 mmol) with  $\text{CH}_3\text{CN}$  as solvent. The reaction was run for 30 minutes at room temperature. Chromatographic purification (Hexane/ethyl acetate) provided 110 mg of compound **4b** as a yellow liquid (85%).  $^1\text{H}$  NMR (500MHz,  $\text{CDCl}_3$ ):  $\delta$  3.10 (t,  $J = 6.5$  Hz, 2H); 2.97 (t,  $J = 6.5$  Hz, 2H); 2.16 (s, 3H). Registry number: 57308-66-4. A copy of the  $^1\text{H}$  NMR spectrum can be found at the end of this document to confirm the compound's purity.

**3-Iodo-1-phenyl-1-propanone (1c)**<sup>8</sup>: The representative procedure was followed using **1** (134 mg, 1 mmol), NaI (150 mg, 1 mmol), and CAN (1.1 g, 2 mmol) with  $\text{CH}_3\text{CN}-\text{H}_2\text{O}(20\%)$  as solvent. The reaction was run for 30 minutes at room temperature. Chromatographic purification (Hexane/ethyl acetate) provided 234 mg of compound **1c** as a yellow liquid (90%).  $^1\text{H}$  NMR (500MHz,  $\text{CDCl}_3$ ):  $\delta$  7.97-7.42 (m, 5H); 3.58 (t,  $J = 7.1$  Hz, 2H); 3.45 (t,  $J = 7.1$  Hz, 2H). A copy of the  $^1\text{H}$  NMR spectrum can be found at the end of this document to confirm the compound's purity.

**3-Iodo-1-(4-methoxy-phenyl)-1-propanone (2c)**: The representative procedure was followed using **2** (164 mg, 1 mmol), NaI (150 mg, 1 mmol), and CAN (1.1 g, 2 mmol) with  $\text{CH}_3\text{CN}-\text{H}_2\text{O}(20\%)$  as solvent. The reaction was run for 30 minutes at room temperature. Chromatographic purification (Hexane/ethyl acetate) provided 248 mg of

compound **2c** as a yellow liquid (92%). <sup>1</sup>H NMR (500MHz, CDCl<sub>3</sub>): δ 7.90-6.83 (m, 4H); 3.81 (s, 3H); 3.82 (t, *J* = 7.1 Hz, 2H); 3.43 (t, *J* = 7.1 Hz, 2H). Registry number: 130543-58-7. A copy of the <sup>1</sup>H NMR spectrum can be found at the end of this document to confirm the compound's purity.

**1-Cyclohexyl-3-iodo-1-propanone (3c)**<sup>9</sup>: The representative procedure was followed using **3** (140 mg, 1 mmol), NaI (150 mg, 1 mmol), and CAN (1.1 g, 2 mmol) with CH<sub>3</sub>CN-H<sub>2</sub>O(20%) as solvent. The reaction was run for 30 minutes at room temperature. Chromatographic purification (Hexane/ethyl acetate) provided 255 mg of compound **3c** as a yellow liquid (96%). <sup>1</sup>H NMR (500MHz, CDCl<sub>3</sub>): δ 3.27 (t, *J* = 7.0 Hz, 2H); 3.08 (t, *J* = 7.0 Hz, 2H); 2.30 (m, 1H); 1.84-1.24 (m, 10H). A copy of the <sup>1</sup>H NMR spectrum can be found at the end of this document to confirm the compound's purity.

**4-Iodo-2-butanone (4c)**<sup>10</sup>: The representative procedure was followed using **4** (72 mg, 1 mmol), NaI (150 mg, 1 mmol), and CAN (1.1 g, 2 mmol) with CH<sub>3</sub>CN-H<sub>2</sub>O(20%) as solvent. The reaction was run for 30 minutes at room temperature. Chromatographic purification (Hexane/ethyl acetate) provided 170 mg of compound **4c** as a yellow liquid (86%). <sup>1</sup>H NMR (500MHz, CDCl<sub>3</sub>): δ 3.25 (t, *J* = 7.0 Hz, 2H); 3.06 (t, *J* = 7.0 Hz, 2H); 2.16 (s, 3H). A copy of the <sup>1</sup>H NMR spectrum can be found at the end of this document to confirm the compound's purity.

**3-Bromo-1-phenyl-1-propanone (1d)**<sup>11</sup>: The representative procedure was followed using **1** (134 mg, 1 mmol), KBr (118 mg, 1 mmol), and CAN (1.1 g, 2 mmol) with CH<sub>2</sub>Cl<sub>2</sub>-H<sub>2</sub>O(50%) as solvent. The reaction was run for 30 minutes at room temperature. Chromatographic purification (Hexane/ethyl acetate) provided 151 mg of compound **1d** as a yellow liquid (71%). <sup>1</sup>H NMR (500MHz, CDCl<sub>3</sub>): δ 7.95-7.34 (m, 5H);

3.72 (t,  $J = 6.8$  Hz, 2H); 3.56 (t,  $J = 6.8$  Hz, 2H). A copy of the  $^1\text{H}$  NMR spectrum can be found at the end of this document to confirm the compound's purity.

**3-Bromo-1-(4-methoxy-phenyl)-1-propanone (2d):** The representative procedure was followed using **2** (164 mg, 1 mmol), KBr (118 mg, 1 mmol), and CAN (1.1 g, 2 mmol) with  $\text{CH}_2\text{Cl}_2\text{-H}_2\text{O}(50\%)$  as solvent. The reaction was run for 30 minutes at room temperature. Chromatographic purification (Hexane/ethyl acetate) provided 182 mg of compound **2d** as a yellow liquid (75%).  $^1\text{H}$  NMR (500MHz,  $\text{CDCl}_3$ ):  $\delta$  7.93-6.87 (m, 4H); 3.85 (s, 3H); 3.71 (t,  $J = 6.9$  Hz, 2H); 3.49 (t,  $J = 6.9$  Hz, 2H). Registry number: 33994-11-5. A copy of the  $^1\text{H}$  NMR spectrum can be found at the end of this document to confirm the compound's purity.

**3-Bromo-1-cyclohexyl-1-propanone (3d):** The representative procedure was followed using **3** (140 mg, 1 mmol), KBr (118 mg, 1 mmol), and CAN (1.1 g, 2 mmol) with  $\text{CH}_2\text{Cl}_2\text{-H}_2\text{O}(50\%)$  as solvent. The reaction was run for 30 minutes at room temperature. Chromatographic purification (Hexane/ethyl acetate) provided 201 mg of compound **3d** as a yellow liquid (92%).  $^1\text{H}$  NMR (500MHz,  $\text{CDCl}_3$ ):  $\delta$  3.53 (t,  $J = 6.8$  Hz, 2H); 3.01 (t,  $J = 6.8$  Hz, 2H); 2.31 (m, 1H); 1.84-1.15 (m, 10H). Registry number: 78864-62-7. A copy of the  $^1\text{H}$  NMR spectrum can be found at the end of this document to confirm the compound's purity.

**4-Bromo-2-butanone (4d)**<sup>11</sup>: The representative procedure was followed using **4** (72 mg, 1 mmol), KBr (118 mg, 1 mmol), and CAN (1.1 g, 2 mmol) with  $\text{CH}_2\text{Cl}_2\text{-H}_2\text{O}(50\%)$  as solvent. The reaction was run for 30 minutes at room temperature. Chromatographic purification (Hexane/ethyl acetate) provided 125 mg of compound **4d** as a yellow liquid (83%).  $^1\text{H}$  NMR (500MHz,  $\text{CDCl}_3$ ):  $\delta$  3.53 (t,  $J = 6.8$  Hz, 2 H); 3.04 (t,

$J = 6.8$  Hz, 2 H); 2.13 (s, 3 H). A copy of the  $^1\text{H}$  NMR spectrum can be found at the end of this document to confirm the compound's purity.

**2-Azidomethyl-1-phenyl-1-butanone (6a):** The representative procedure was followed using **5** (162 mg, 1 mmol),  $\text{NaN}_3$  (65 mg, 1 mmol), and CAN (1.1 g, 2 mmol) with  $\text{CH}_3\text{CN-H}_2\text{O}(20\%)$  as solvent. The reaction was run for 30 minutes at room temperature. GC analysis suggested 48% yield of **6a** was obtained. Pure product was obtained from silica gel chromatography as a yellow oil.  $^1\text{H}$  NMR (500MHz,  $\text{CDCl}_3$ ):  $\delta$  7.95-7.44 (m, 5H); 5.65 (m, 1H); 3.42 (dd,  $J = 6.6, 17.4$  Hz, 1H); 3.17 (dd,  $J = 5.9, 17.4$  Hz, 1H); 2.36-1.05 (m, 2H); 1.02 (t,  $J = 7.4$  Hz, 3H).  $^{13}\text{C}$  NMR (125MHz,  $\text{CDCl}_3$ ):  $\delta$  201.5; 128.4; 128.0; 127.6; 125.4; 40.3; 37.9; 22.2; 13.5. GC-MS:  $m/z$  (rel int) 203 ( $\text{M}^+$ , 5); 161 (65); 105 (100); 77 (50); 51 (27). FAB-HRMS calcd for  $\text{C}_{11}\text{H}_{14}\text{ON}_3$  ( $\text{M}+\text{H}$ ) $^+$ : 204.1137, found: 204.1142.

**2-Iodomethyl-1-phenyl-1-butanone (6b):** The representative procedure was followed using **5** (162 mg, 1 mmol), NaI (150 mg, 1 mmol), and CAN (1.1 g, 2 mmol) with  $\text{CH}_3\text{CN-H}_2\text{O}(20\%)$  as solvent. The reaction was run for 30 minutes at room temperature. Chromatographic purification (Hexane/ethyl acetate) provided 190 mg of compound **6b** as a yellow liquid (66%).  $^1\text{H}$  NMR (500MHz,  $\text{CDCl}_3$ ):  $\delta$  7.94-7.32 (m, 5H); 4.58 (m, 1H); 3.81 (dd,  $J = 7.5, 17.4$  Hz, 1H); 3.52 (dd,  $J = 6.4, 17.4$  Hz, 1H); 1.83 (m, 1H); 1.27 (m, 1H); 1.06 (t,  $J = 7.2$  Hz, 3H).  $^{13}\text{C}$  NMR (125MHz,  $\text{CDCl}_3$ ):  $\delta$  202.8; 133.0; 132.1; 128.3; 127.6; 48.7; 29.8; 25.4; 13.8. GC-MS:  $m/z$  (rel int) 288 ( $\text{M}^+$ , 1); 161 (28); 105 (100); 77 (57); 51 (21). FAB-HRMS calcd for  $\text{C}_{11}\text{H}_{14}\text{OI}$  ( $\text{M}+\text{H}$ ) $^+$ : 289.0089, found: 289.0084.

**2-Bromomethyl-1-phenyl-1-butanone (6c):** The representative procedure was followed using **5** (162 mg, 1 mmol), KBr (118 mg, 1 mmol), and CAN (1.1 g, 2 mmol) with CH<sub>2</sub>Cl<sub>2</sub>-H<sub>2</sub>O(50%) as solvent. The reaction was run for 30 minutes at room temperature. Chromatographic purification (Hexane/ethyl acetate) provided 142 mg of compound **6c** as a yellow oil (59%). <sup>1</sup>H NMR (500MHz, CDCl<sub>3</sub>): δ 7.96-7.45 (m, 5H); 3.83 (m, 1H); 3.75 (dd, *J* = 8.3, 9.7 Hz, 1H); 3.49 (dd, *J* = 5.5, 9.8 Hz, 1H); 1.85 (m, 1H); 1.39 (m, 1H); 0.88 (t, *J* = 7.5 Hz, 3H). <sup>13</sup>C NMR (125MHz, CDCl<sub>3</sub>): δ 201.9; 132.9; 132.4; 128.4; 127.6; 49.5; 31.7; 26.1; 12.7. GC-MS: *m/z* (rel int) 240 (M<sup>+</sup>, 2); 149 (41); 104 (100); 76 (32); 50 (9). FAB-HRMS calcd for C<sub>11</sub>H<sub>14</sub>OBr (M+H)<sup>+</sup>: 241.0228, found: 241.0247.

**3-Azido-cycloheptanone (9a):** The representative procedure was followed using **8** (112 mg, 1 mmol), NaN<sub>3</sub> (65 mg, 1 mmol), and CAN (1.1 g, 2 mmol) with CH<sub>3</sub>CN-H<sub>2</sub>O(20%) as solvent. The reaction was run for 30 minutes at room temperature. GC analysis suggested 56% yield of **9a** was obtained. Pure product was obtained from silica gel chromatography as a yellow oil. <sup>1</sup>H NMR (500MHz, CDCl<sub>3</sub>): δ 5.23 (m, 1H); 2.88 (m, 2H); 2.53-2.00 (m, 4H); 1.80-1.53 (m, 4H). <sup>13</sup>C NMR (125MHz, CDCl<sub>3</sub>): δ 207.8; 51.7; 46.3; 43.6; 33.2; 24.1; 23.2. GC-MS: *m/z* (rel int) 153 (M<sup>+</sup>, 12); 111 (76); 83 (25); 54 (100). FAB-HRMS calcd for C<sub>7</sub>H<sub>12</sub>ON<sub>3</sub> (M+H)<sup>+</sup>: 154.0980, found: 154.0987.

**3-Iodo-cycloheptanone (9b)**<sup>9</sup>: The representative procedure was followed using **8** (112 mg, 1 mmol), NaI (150 mg, 1 mmol), and CAN (1.1 g, 2 mmol) with CH<sub>3</sub>CN-H<sub>2</sub>O(20%) as solvent. The reaction was run for 30 minutes at room temperature. Chromatographic purification (Hexane/ethyl acetate) provided 162 mg of compound **9b** as a yellow liquid (68%). <sup>1</sup>H NMR (500MHz, CDCl<sub>3</sub>): δ 4.49 (m, 1H); 3.24 (dd, *J* = 2.9,

15.1 Hz, 1H); 3.14 (dd,  $J = 9.4, 15.0$  Hz, 1H); 2.60-1.73 (m, 8H). The isolated yield of compound **9b** was improved to 87% using compound **10** at 0 °C following the same procedure. A copy of the  $^1\text{H}$  NMR spectrum can be found at the end of this document to confirm the compound's purity.

**3-Bromo-cycloheptanone (9c)**: The representative procedure was followed using **8** (112 mg, 1 mmol), KBr (118 mg, 1 mmol), and CAN (1.1 g, 2 mmol) with  $\text{CH}_2\text{Cl}_2$ - $\text{H}_2\text{O}$ (50%) as solvent. The reaction was run for 30 minutes at room temperature. Chromatographic purification (Hexane/ethyl acetate) provided 114 mg of compound **6c** as a yellow oil (60%).  $^1\text{H}$  NMR (500MHz,  $\text{CDCl}_3$ ):  $\delta$  4.40 (m, 1H); 3.15 (dd,  $J = 2.9, 15.1$  Hz, 1H); 3.07 (dd,  $J = 8.7, 15.1$  Hz, 1H); 2.59-2.40 (m, 2H); 2.23-2.21 (m, 2H); 1.77-1.74 (m, 4H).  $^{13}\text{C}$  NMR (125MHz,  $\text{CDCl}_3$ ):  $\delta$  204.6; 52.7; 47.1; 43.4; 40.6; 26.8; 23.0. GC-MS:  $m/z$  (rel int) 190 ( $\text{M}^+$ , 10); 111 (60); 83 (28); 54 (100). FAB-HRMS calcd for  $\text{C}_7\text{H}_{12}\text{OBr}$  ( $\text{M}+\text{H}$ ) $^+$ : 191.0072, found: 191.0045.

#### References:

1. (a) Kulinkovich, O. G.; Sviridov, S. V.; Vasilevski, D. A. *Zh. Org. Khim.* **1989**, 25, 2244. (b) Lee, J. C.; Sung, M. J.; Cha, J. K. *Tetrahedron Lett.* **2001**, 42, 2059-2061.
2. Salaun, J. *J. Org. Chem.* **1978**, 43, 2809-2815.
3. Barluenga, J.; Fernandez-Simon, J. L.; Concellon, J. M.; Yus, M. *Synthesis* **1987**, (6), 584-586.
4. Fujita, K.; Yorimitsu, H.; Shinokubo, H.; Matsubara, S.; Oshima, K. *J. Am. Chem. Soc.* **2001**, 123, 12115-12116.
5. Lee, J.; Kang, C. H.; Kim, H.; Cha, J. K. *J. Am. Chem. Soc.* **1996**, 118, 291-292.
6. Murai, S.; Aya, T.; Sonoda, N. *J. Org. Chem.* **1973**, 38, 4354-4356.
7. Singh, P. N. D.; Muthukrishnan, S.; Murthy, R. S.; Klima, R. F.; Mandel, S. M.; Hawk, M.; Yarbrough, N.; Gudmundsdottir, A. D. *Tetrahedron Lett.* **2003**, 44, 9169-9171.
8. Narasimhan, N. S.; Patil, P. A. *Tetrahedron Lett.* **1986**, 27, 5133-5134.
9. Miller, R. D.; McKean, D. R. *Tetrahedron Lett.* **1980**, 21, 2639-2642.
10. Trost, B. M.; Kunz, R. A. *J. Am. Chem. Soc.* **1975**, 97, 7152-7157.
11. Heasley, V. L.; Louie, T. J.; Luttrull, D. K.; Millar, M. D.; Moore, H. B.; Nogales, D. F.; Sauerbrey, A. M.; Shevel, A. B.; Shibuya, T. Y.; et al. *J. Org. Chem.* **1988**, 53, 2199-2204.

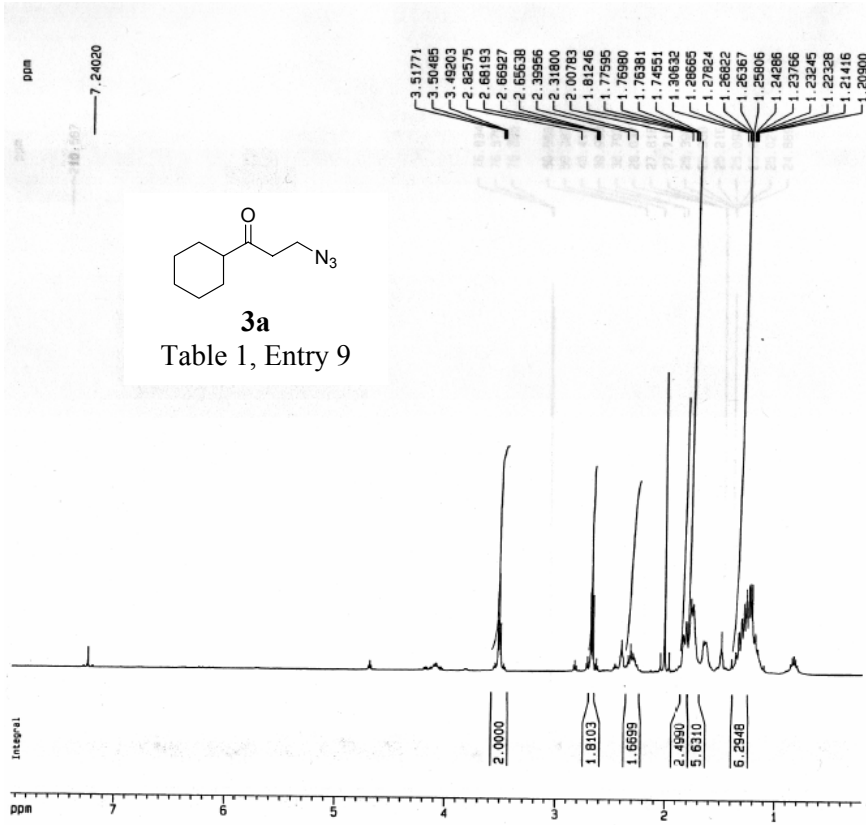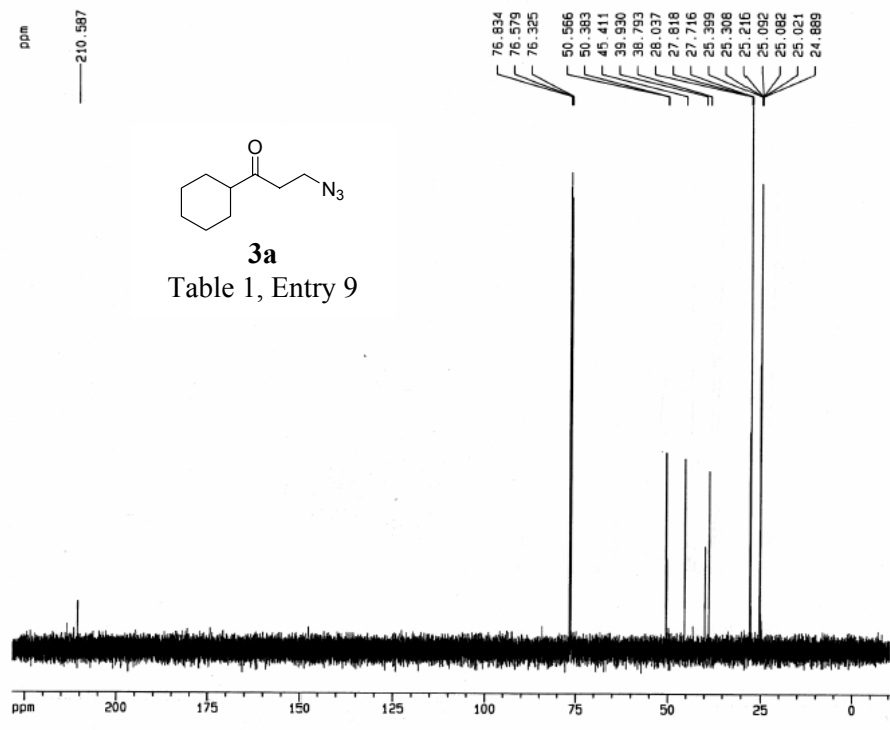



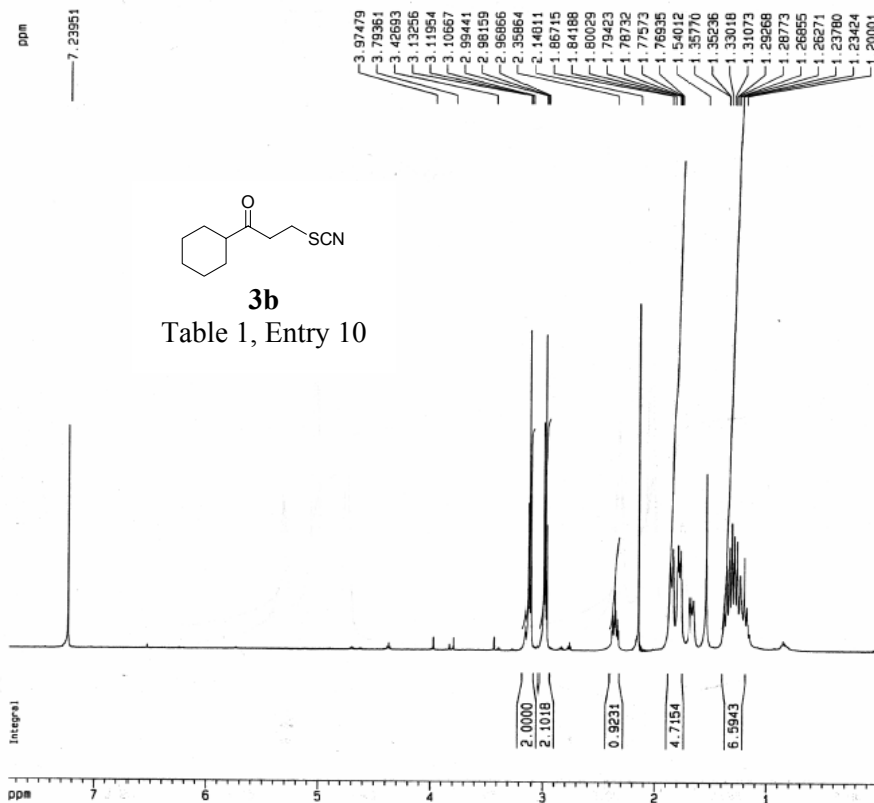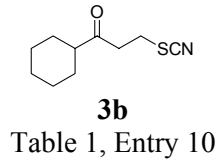

Current Data Parameters  
 NAME j073106  
 EXPNO 5  
 PROCNO 1

F2 - Acquisition Parameter  
 Date\_ 20060731  
 Time 16.47  
 INSTRUM spect  
 PROBHD 5 mm PHBBO BB-  
 PULPROG zg  
 TD 32768  
 SOLVENT CDCl3  
 NS 8  
 DS 0  
 SWH 17985.611 Hz  
 FIDRES 0.548877 Hz  
 AQ 0.9110282 se  
 RG 228.1  
 DW 27.800 us  
 DE 7.00 us  
 TE 299.8 K  
 D1 1.00000000 se

\*\*\*\*\* CHANNEL f1 \*\*\*\*\*  
 NUC1 1H  
 P1 5.00 us  
 PL1 -4.00 dB  
 SFO1 500.1319002 MHz

F2 - Processing parameters  
 SI 32768  
 SF 500.1300233 MHz  
 WDW EM  
 SSB 0  
 LB 0.20 Hz  
 GB 0  
 PC 4.00

1D NMR plot parameters  
 CX 20.00 cm  
 CY 8.00 cm  
 F1P 7.767 pp  
 F1 3884.76 Hz  
 F2P -0.048 pp  
 F2 -24.23 Hz  
 PPMCM 0.39080 pp  
 HZCM 195.44934 Hz

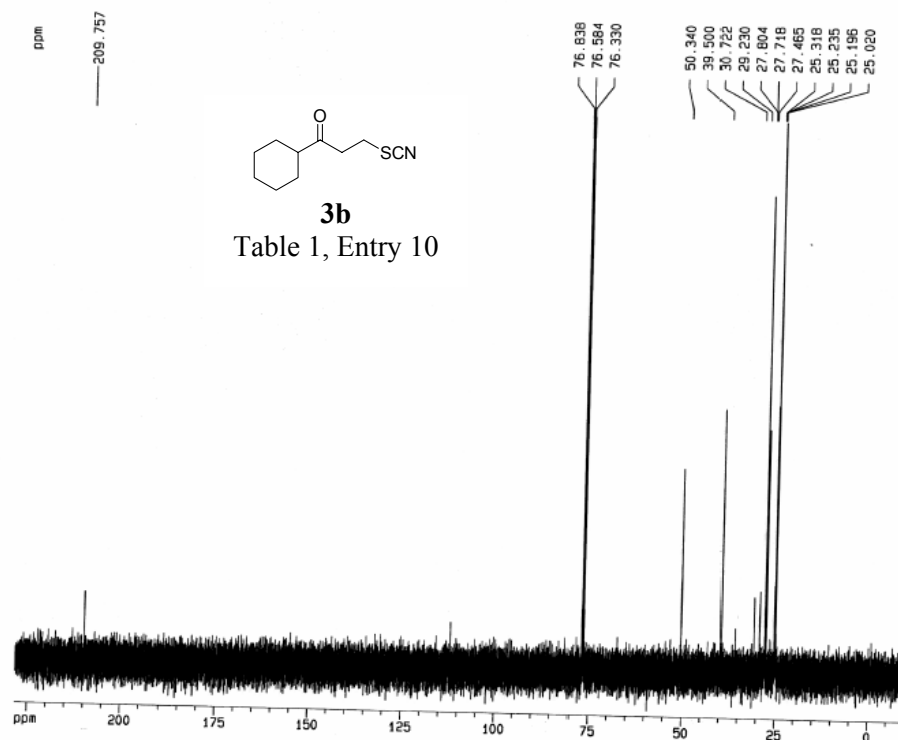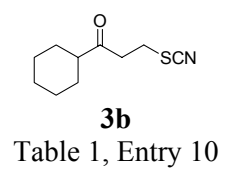

Current Data Parameters  
 NAME j072806  
 EXPNO 2  
 PROCNO 1

F2 - Acquisition Parameters  
 Date\_ 20060728  
 Time 16.06  
 INSTRUM spect  
 PROBHD 5 mm PHBBO BB-  
 PULPROG zgpg30  
 TD 65536  
 SOLVENT CDCl3  
 NS 201  
 DS 0  
 SWH 30030.029 Hz  
 FIDRES 0.458222 Hz  
 AQ 1.0912410 sec  
 RG 3591  
 DW 16.650 usec  
 DE 7.00 usec  
 TE 300.6 K  
 D1 1.00000000 sec  
 d11 0.03000000 sec

\*\*\*\*\* CHANNEL f1 \*\*\*\*\*  
 NUC1 13C  
 P1 7.80 usec  
 PL1 1.00 dB  
 SFO1 125.7715390 MHz

\*\*\*\*\* CHANNEL f2 \*\*\*\*\*  
 CPDPRG2 waltz16  
 NUC2 1H  
 P2 100.00 usec  
 PL2 17.50 dB  
 PL12 17.50 dB  
 SFO2 500.1325000 MHz

F2 - Processing parameters  
 SI 65536  
 SF 125.7578466 MHz  
 NDM no  
 SSB 0  
 LB 0.00 Hz  
 GB 0  
 PC 1.40

1D NMR plot parameters  
 CX 20.00 cm  
 CY 12.50 cm  
 F1P 288.276 pp  
 F1 28707.46 Hz  
 F2P -10.517 pp  
 F2 -1322.57 Hz  
 PPMCM 11.93965 pp/cm  
 HZCM 1501.50159 Hz/cm

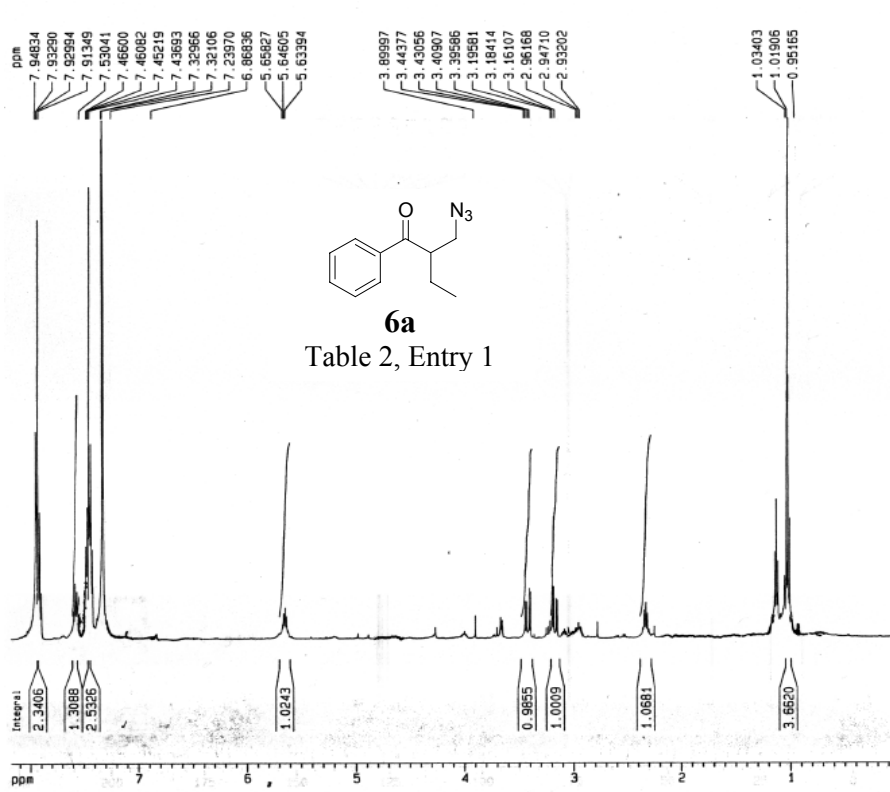

```

NAME          j101106
EXPNO         1
PROCNO        1

F2 - Acquisition Parameter
Date_         20061011
Time          14.38
INSTRUM       spect
PROBHD        5 mm PHBBO BB-
PULPROG       zg
TD             32768
SOLVENT       CDC13
NS             8
DS             0
SMH           17985.611 Hz
FIDRES        0.548877 Hz
AQ             0.9110282 se
RG             101.6
DM             27.800 us
DE             7.00 us
TE             301.1 K
D1             1.00000000 se

----- CHANNEL f1 -----
NUC1           1H
P1              5.00 us
PL1             -4.00 dB
SFO1           500.1319002 MH

F2 - Processing parameters
SI             32768
SF             500.1300233 MH
WDW            EM
SSB            0
LB             0.20 Hz
GB             0
PC             4.00

1D NMR plot parameters
CX             20.00 cm
CY             13.00 cm
F1P            8.186 pp
F1             4094.10 Hz
F2P            0.065 pp
F2             32.42 Hz
PPMCM          0.40606 pp
HZCM           203.08412 Hz

```

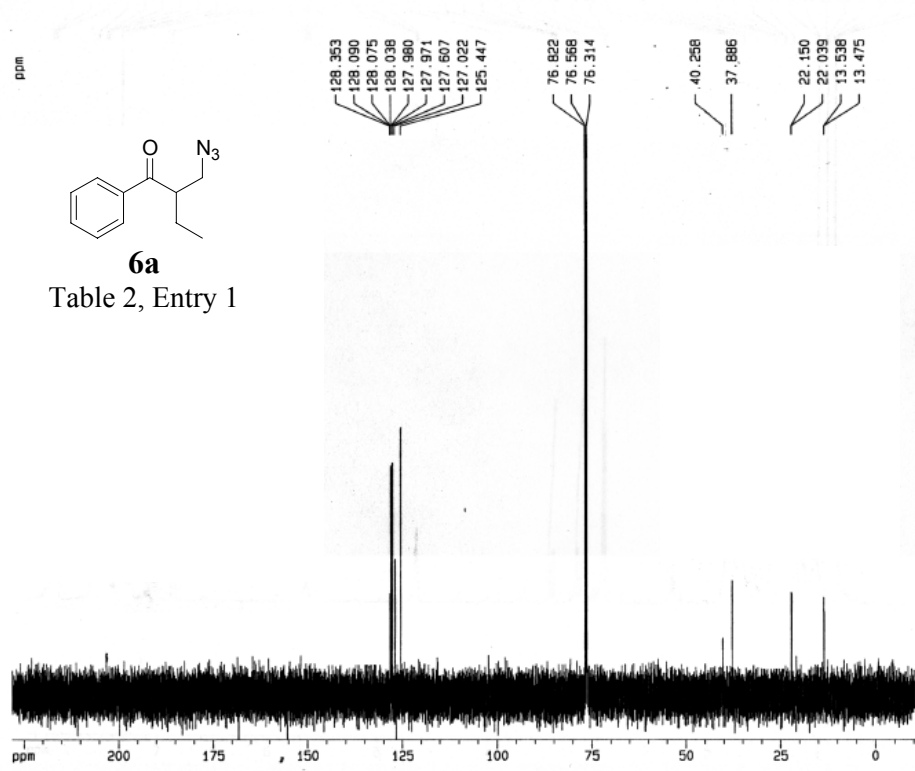

```

Current Data Parameters
NAME          j101106
EXPNO         2
PROCNO        1

F2 - Acquisition Parameters
Date_         20061011
Time          15.00
INSTRUM       spect
PROBHD        5 mm PHBBO BB-
PULPROG       zgpg30
TD             65536
SOLVENT       CDC13
NS             155
DS             0
SMH           30030.929 Hz
FIDRES        0.456222 Hz
AQ             1.0912410 sec
RG             4597.6
DM             16.650 usec
DE             7.00 usec
TE             301.8 K
D1             1.00000000 sec
d11            0.03000000 sec

----- CHANNEL f1 -----
NUC1           13C
P1              7.00 usec
PL1             1.00 dB
SFO1           125.7715390 MHz

----- CHANNEL f2 -----
CPDPRG02      waltz16
NUC2           1H
P2              100.00 usec
PL2            17.50 dB
PL12           17.50 dB
SFO2           500.1325000 MHz

F2 - Processing parameters
SI             65536
SF             125.7576466 MHz
WDW            no
SSB            0
LB             0.00 Hz
GB             0
PC             1.40

1D NMR plot parameters
CX             20.00 cm
CY             6.00 cm
F1P            208.276 ppm
F1             26707.46 Hz
F2P            -10.517 ppm
F2             -1322.57 Hz
PPMCM          11.93963 ppm/cm
HZCM           1501.50159 Hz/cm

```

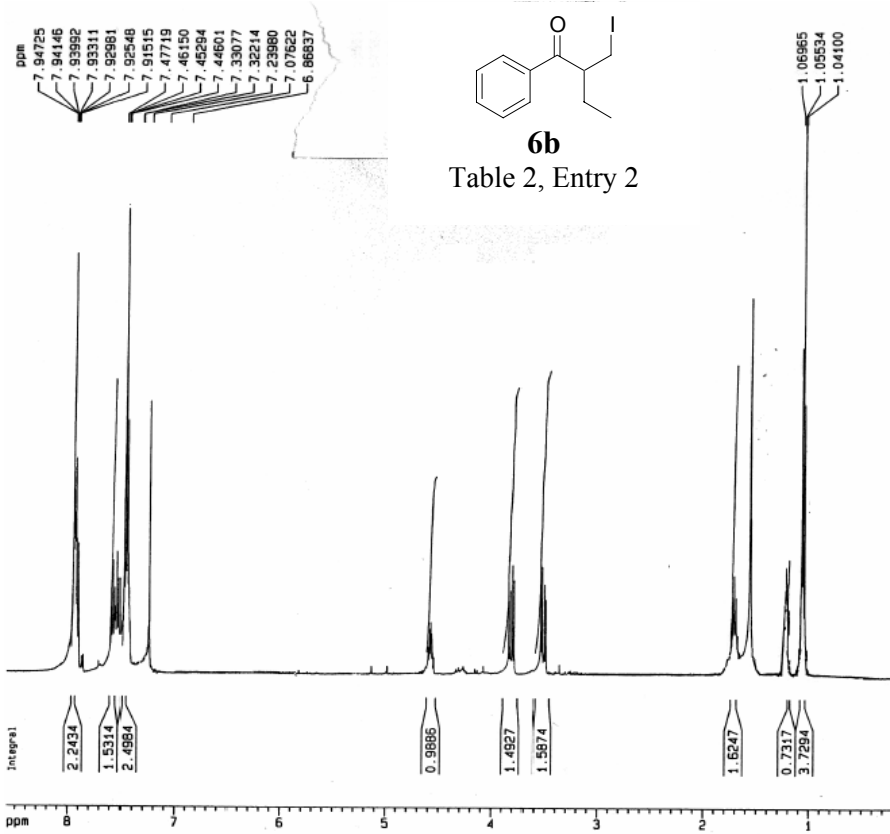

```

j100406
EXPNO 2
PROCNO 1

F2 - Acquisition Parameter
Date_ 20061004
Time 11.16
INSTRUM spect
PROBHD 5 mm PHB80 BB-
PULPROG zg
TD 32768
SOLVENT CDC13
NS 8
DS 0
SWH 17985.611 Hz
FIDRES 0.548877 Hz
AQ 0.9110262 se
RG 161.3
DM 27.800 us
DE 7.00 us
TE 301.1 K
D1 1.0000000 se

===== CHANNEL f1 =====
NUC1 1H
P1 5.00 us
PL1 -4.00 dB
SF01 500.1319002 MH

F2 - Processing parameters
SI 32768
SF 500.1300233 MH
WDW EM
SSB 0
LB 0.20 Hz
GB 0
PC 4.00
  
```

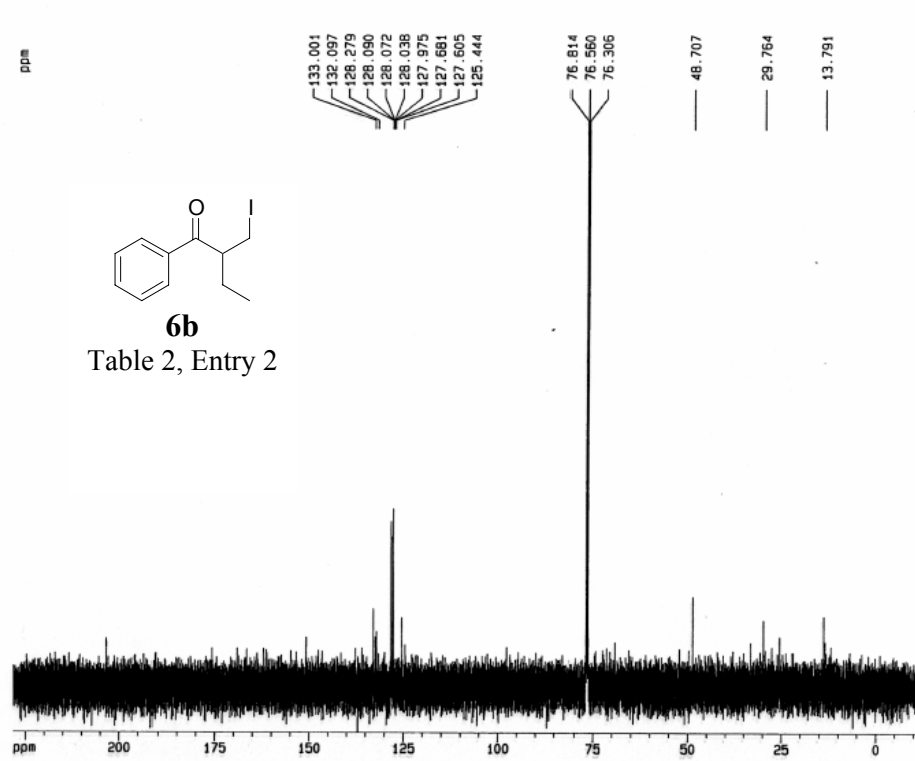

```

Current Data Parameters
NAME j100406
EXPNO 3
PROCNO 1

F2 - Acquisition Parameters
Date_ 20061004
Time 11.27
INSTRUM spect
PROBHD 5 mm PHB80 BB-
PULPROG zgpg30
TD 65536
SOLVENT CDC13
NS 245
DS 0
SWH 30030.029 Hz
FIDRES 0.458222 Hz
AQ 1.0512410 sec
RG 2896.3
DM 16.650 usec
DE 7.00 usec
TE 300.0 K
D1 1.0000000 sec
d11 0.0300000 sec

===== CHANNEL f1 =====
NUC1 13C
P1 7.80 usec
PL1 1.00 dB
SF01 125.7715390 MHz

===== CHANNEL f2 =====
CPOPRG2 waltz16
NUC2 1H
PCPD2 100.00 usec
PL2 17.50 dB
PL12 17.50 dB
SF02 500.1325000 MHz

F2 - Processing parameters
SI 65536
SF 125.7578466 MHz
WDW no
SSB 0
LB 0.00 Hz
GB 0
PC 1.40

ID NMR plot parameters
CX 20.00 cm
CY 4.00 cm
F1P 228.276 ppm
F1 28707.45 Hz
F2P -10.517 ppm
F2 -1322.57 Hz
PPMCM 11.93963 ppm/cm
HZCM 1501.50159 Hz/cm
  
```

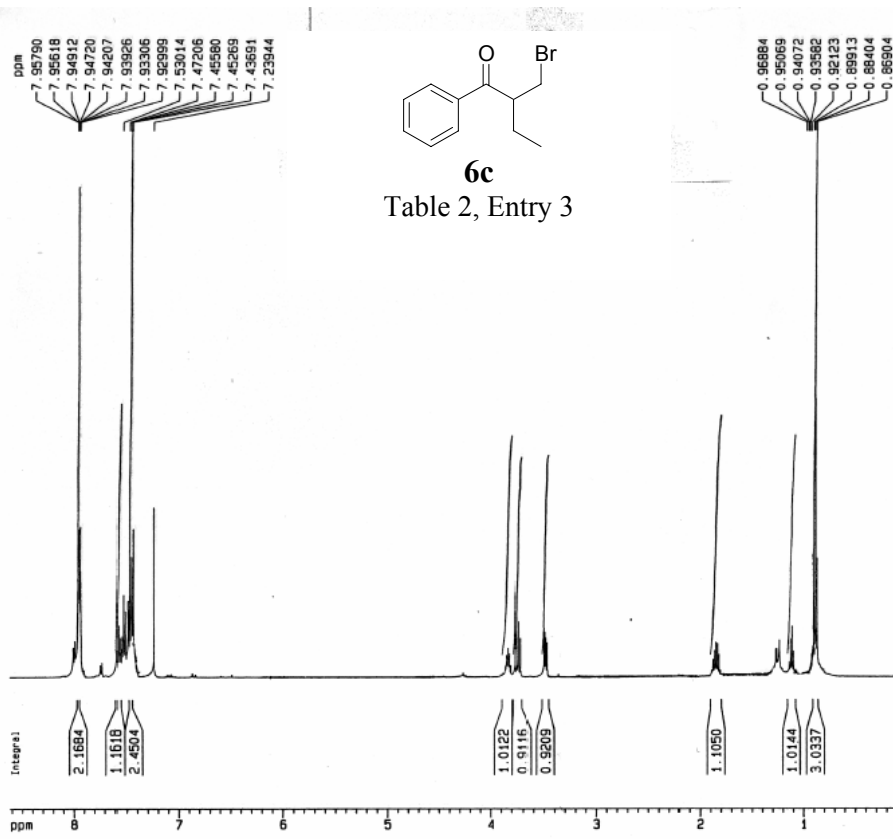

```

NAME          j100206
EXPNO         1
PROCNO       1

F2 - Acquisition Parameter
Date_        20061002
Time         15.25
INSTRUM      spect
PROBHD       5 mm PHBBO BB-
PULPROG      zg
TD           32768
SOLVENT      CDCl3
NS           8
DS           0
SWH          17985.611 Hz
FIDRES       0.548877 Hz
AQ           0.9110282 se
RG           181
DM           27.800 us
DE           7.00 us
TE           301.2 K
D1           1.0000000 se

----- CHANNEL f1 -----
NUC1         1H
P1           5.00 us
PL1          -4.00 dB
SF01        500.1319002 MHz

F2 - Processing parameters
SI           32768
SF           500.1300233 MHz
WDW          EM
SSB          0
LB           0.20 Hz
GB           0
PC           4.00

1D NMR plot parameters
CX           20.00 cm
CY           10.00 cm
F1P         8.622 pp
F1          4311.97 Hz
F2P         0.122 pp
F2          61.21 Hz
PPMCM       0.42497 pp
HZCM        212.53781 Hz
  
```

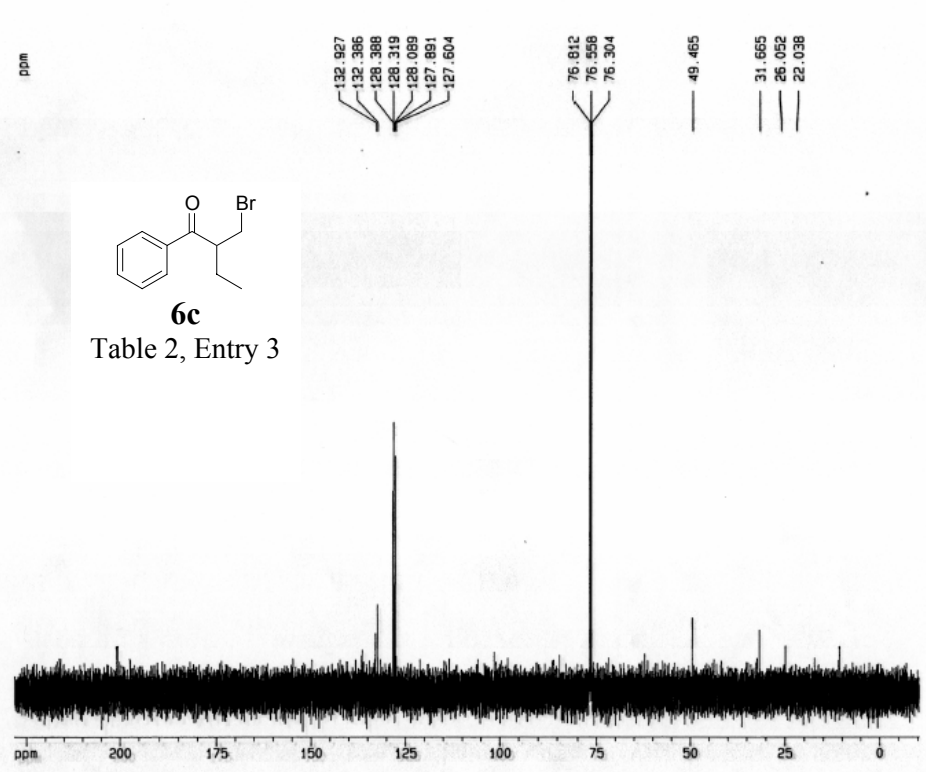

```

Current Data Parameters
NAME          j100206
EXPNO         2
PROCNO       1

F2 - Acquisition Parameters
Date_        20061002
Time         15.38
INSTRUM      spect
PROBHD       5 mm PHBBO BB-
PULPROG      zgdc30
TD           65536
SOLVENT      CDCl3
NS           217
DS           0
SWH          30030.029 Hz
FIDRES       0.458222 Hz
AQ           1.0912410 sec
RG           4096
DM           16.650 usec
DE           7.00 usec
TE           301.9 K
D1           1.0000000 sec
d11          0.0300000 sec

----- CHANNEL f1 -----
NUC1         13C
P1           7.80 usec
PL1          1.00 dB
SF01        125.7715390 MHz

----- CHANNEL f2 -----
CPDPRG2     waltz16
NUC2         1H
PCPD2       100.00 usec
PL2         17.50 dB
PL12        17.50 dB
SF02        500.1325000 MHz

F2 - Processing parameters
SI           65536
SF           125.7578466 MHz
WDW          no
SSB          0
LB           0.00 Hz
GB           0
PC           1.40

1D NMR plot parameters
CX           20.00 cm
CY           6.00 cm
F1P         228.276 ppm
F1          28707.46 Hz
F2P         -10.517 ppm
F2          -1322.57 Hz
PPMCM       11.93963 ppm/cm
HZCM        1501.50159 Hz/cm
  
```

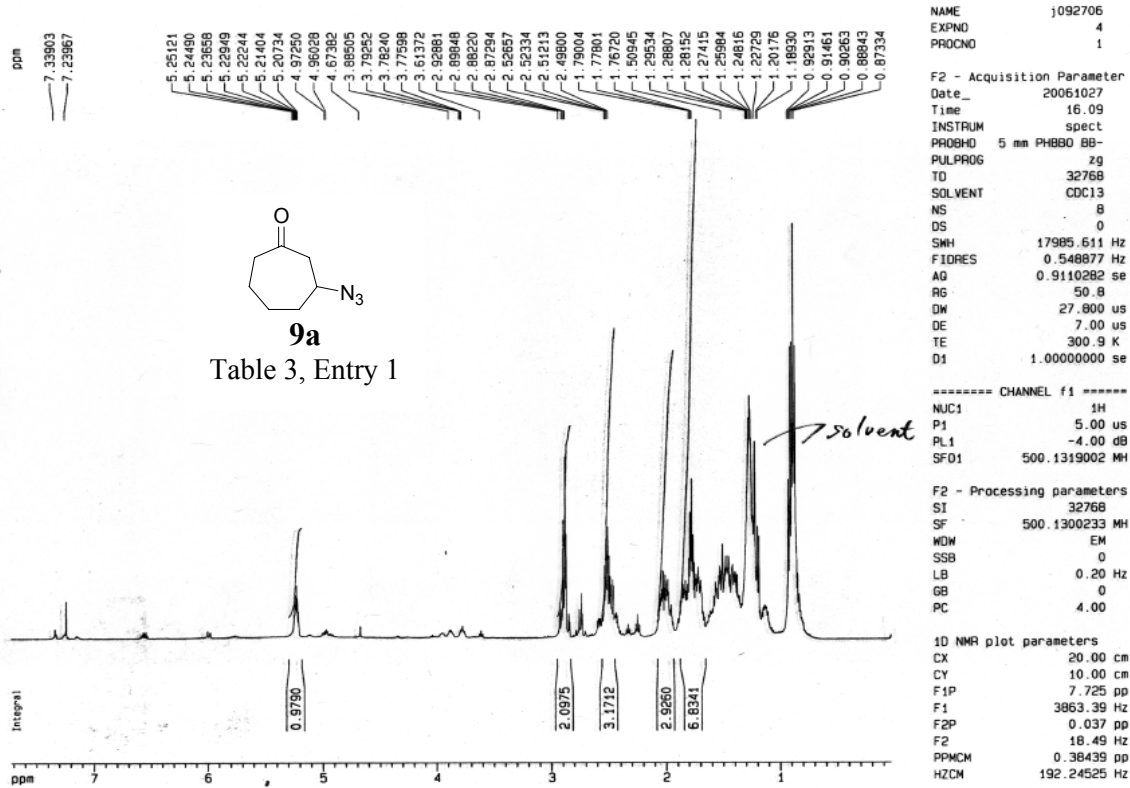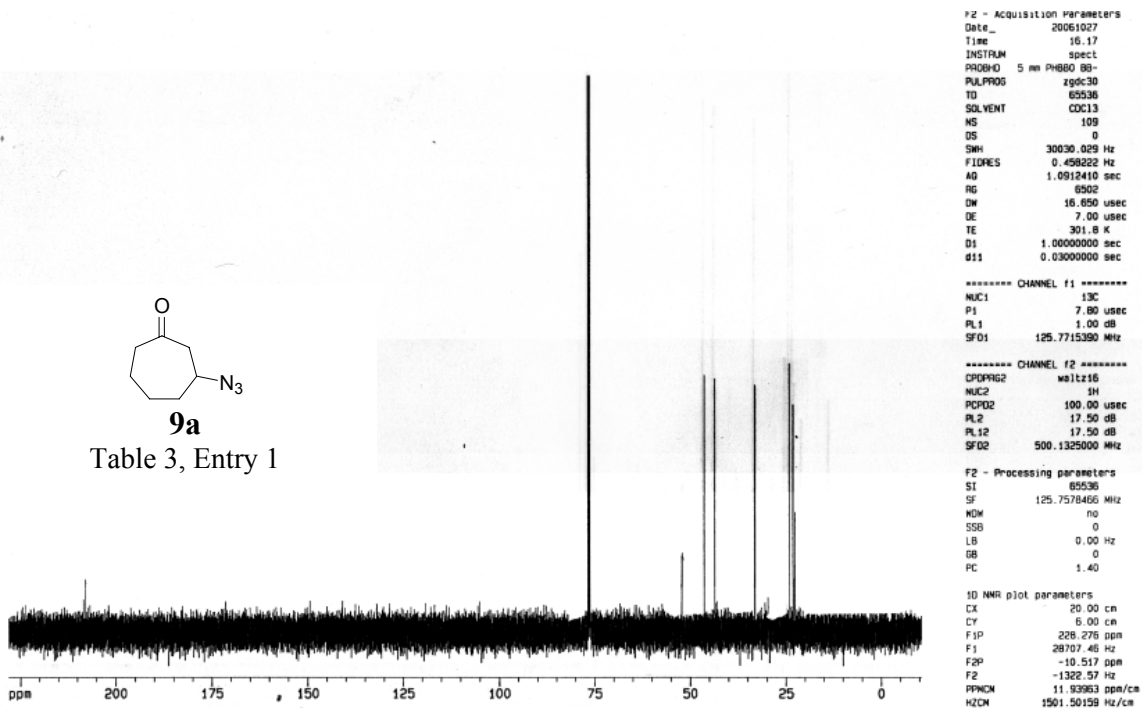

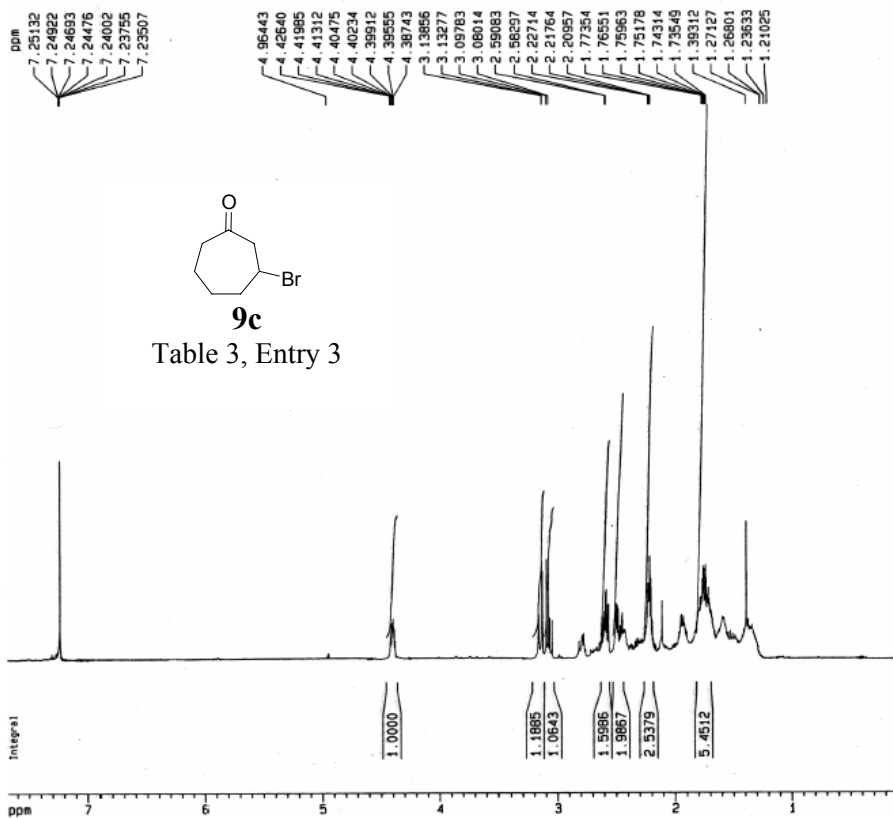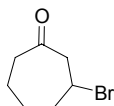

9c

Table 3, Entry 3

Current Data Parameters  
NAME j092706  
EXPNO 2  
PROCNO 1

F2 - Acquisition Parameter  
Date\_ 20061027  
Time 15.50  
INSTRUM spect  
PROBHD 5 mm PH80 BB-  
PULPROG zg  
TD 32768  
SOLVENT CDC13  
NS 8  
DS 0  
SMH 17985.611 Hz  
FIDRES 0.548877 Hz  
AQ 0.9110282 se  
RG 181  
DW 27.800 us  
DE 7.00 us  
TE 301.0 K  
D1 1.00000000 se

===== CHANNEL f1 =====  
NUC1 1H  
P1 5.00 us  
PL1 -4.00 dB  
SF01 500.1319002 MHz

F2 - Processing parameters  
SI 32768  
SF 500.1300233 MHz  
WDW EM  
SSB 0  
LB 0.20 Hz  
GB 0  
PC 4.00

1D NMR plot parameters  
CX 20.00 cm  
CY 10.00 cm  
F1P 7.682 pp  
F1 3842.03 Hz  
F2P 0.080 pp  
F2 39.85 Hz  
PPMCM 0.38012 pp  
HZCM 190.10921 Hz

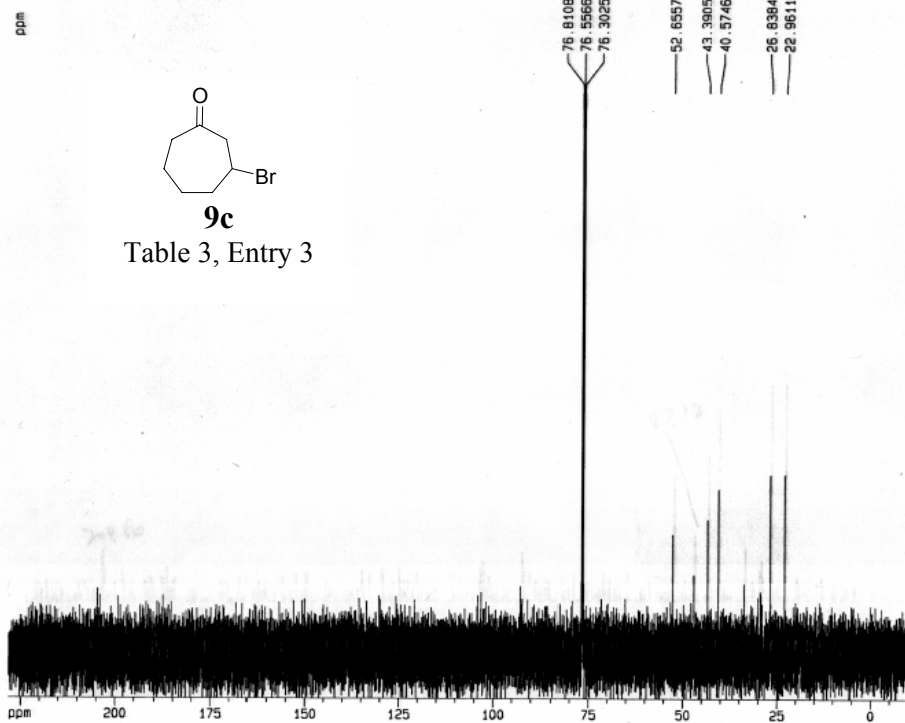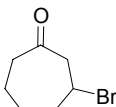

9c

Table 3, Entry 3

Current Data Parameters  
NAME j092706  
EXPNO 3  
PROCNO 1

F2 - Acquisition Parameters  
Date\_ 20061027  
Time 15.58  
INSTRUM spect  
PROBHD 5 mm PH80 BB-  
PULPROG zgdc30  
TD 65536  
SOLVENT CDC13  
NS 208  
DS 0  
SMH 30030.059 Hz  
FIDRES 0.458222 Hz  
AQ 1.0912410 sec  
RG 14595.5  
DW 16.850 usec  
DE 7.00 usec  
TE 301.7 K  
D1 1.00000000 sec  
d11 0.03000000 sec

===== CHANNEL f1 =====  
NUC1 13C  
P1 7.00 usec  
PL1 1.00 dB  
SF01 125.7715390 MHz

===== CHANNEL f2 =====  
CPDPRG2 waltz16  
NUC2 1H  
PCPD2 100.00 usec  
PL2 17.50 dB  
PL12 17.50 dB  
SF02 500.1325000 MHz

F2 - Processing parameters  
SI 65536  
SF 125.7578466 MHz  
NDW no  
SSB 0  
LB 0.00 Hz  
GB 0  
PC 1.40

1D NMR plot parameters  
CX 20.00 cm  
CY 4.00 cm  
F1P 228.276 ppm  
F1 28707.46 Hz  
F2P -10.517 ppm  
F2 -1322.57 Hz  
PPMCM 11.93963 ppm/cm  
HZCM 1501.50159 Hz/cm

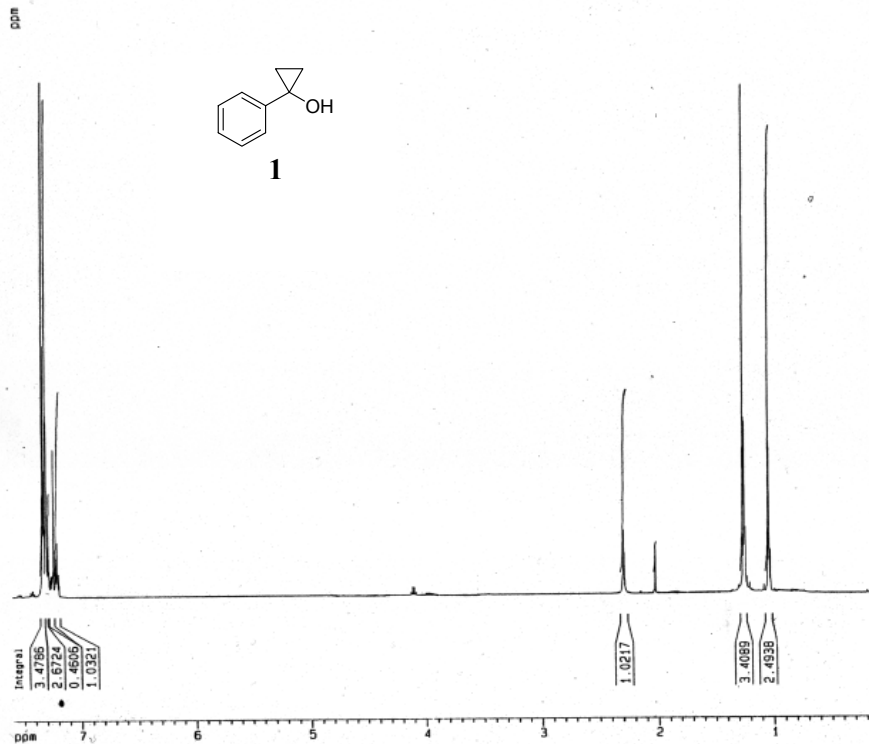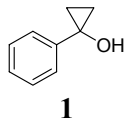

Current Data Parameters  
NAME j041306  
EXPNO 1  
PROCNO 1

F2 - Acquisition Parameter  
Date\_ 20060413  
Time 10.47  
INSTRUM spect  
PROBHD 5 mm PH80 BB-  
PULPROG zg  
TD 32768  
SOLVENT CDCl3  
NS 8  
DS 0  
SWH 5000.000 Hz  
FIDRES 0.152588 Hz  
AQ 3.2769499 se  
RG 128  
DM 100.000 us  
DE 7.00 us  
TE 300.4 K  
D1 1.00000000 se

\*\*\*\*\* CHANNEL f1 \*\*\*\*\*  
NUC1 1H  
P1 5.00 us  
PL1 -4.00 dB  
SFO1 500.1319002 MHz

F2 - Processing parameters  
SI 32768  
SF 500.1300233 MHz  
WDW EM  
SSB 0  
LB 0.20 Hz  
GB 0  
PC 4.00

ID NMR plot parameters  
CX 20.00 cm  
CY 150.00 cm  
F1P 7.599 pp  
F1 3800.54 Hz  
F2P 0.124 pp  
F2 62.22 Hz  
PPMCM 0.37373 pp  
HZCM 186.91589 Hz

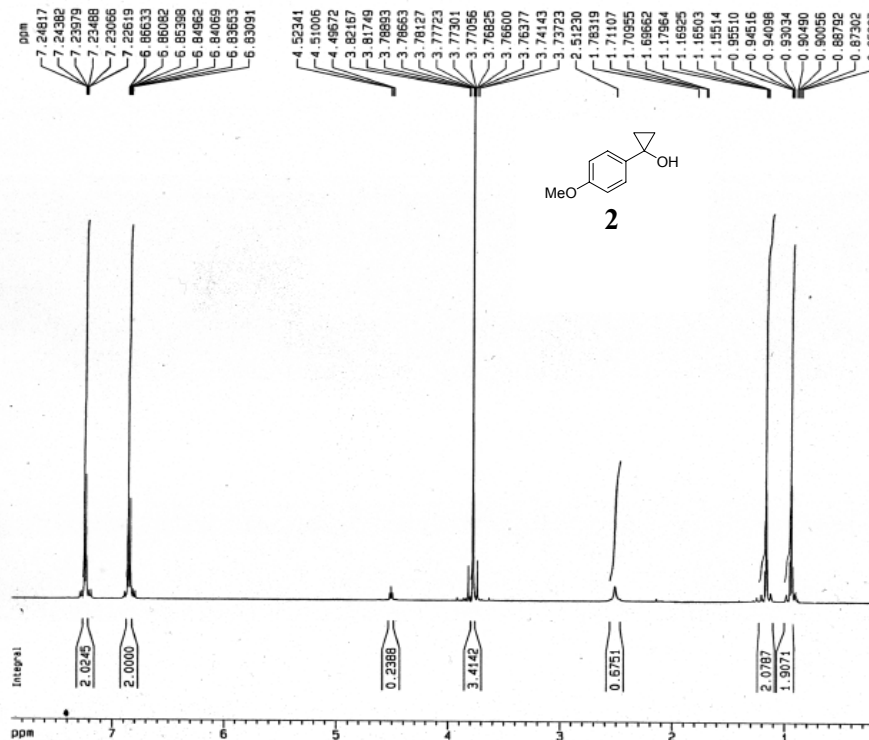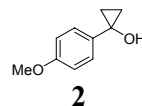

Current Data Parameters  
NAME j060906  
EXPNO 3  
PROCNO 1

F2 - Acquisition Parameter  
Date\_ 20060609  
Time 14.41  
INSTRUM spect  
PROBHD 5 mm PH80 BB-  
PULPROG zg  
TD 32768  
SOLVENT CDCl3  
NS 8  
DS 0  
SWH 17985.611 Hz  
FIDRES 0.548877 Hz  
AQ 0.9110282 se  
RG 50.8  
DM 27.800 us  
DE 7.00 us  
TE 299.5 K  
D1 1.00000000 se

\*\*\*\*\* CHANNEL f1 \*\*\*\*\*  
NUC1 1H  
P1 5.00 us  
PL1 -4.00 dB  
SFO1 500.1319002 MHz

F2 - Processing parameters  
SI 32768  
SF 500.1300233 MHz  
WDW EM  
SSB 0  
LB 0.20 Hz  
GB 0  
PC 4.00

ID NMR plot parameters  
CX 20.00 cm  
CY 13.00 cm  
F1P 7.896 pp  
F1 3948.84 Hz  
F2P 0.165 pp  
F2 82.57 Hz  
PPMCM 0.38653 pp  
HZCM 193.31329 Hz

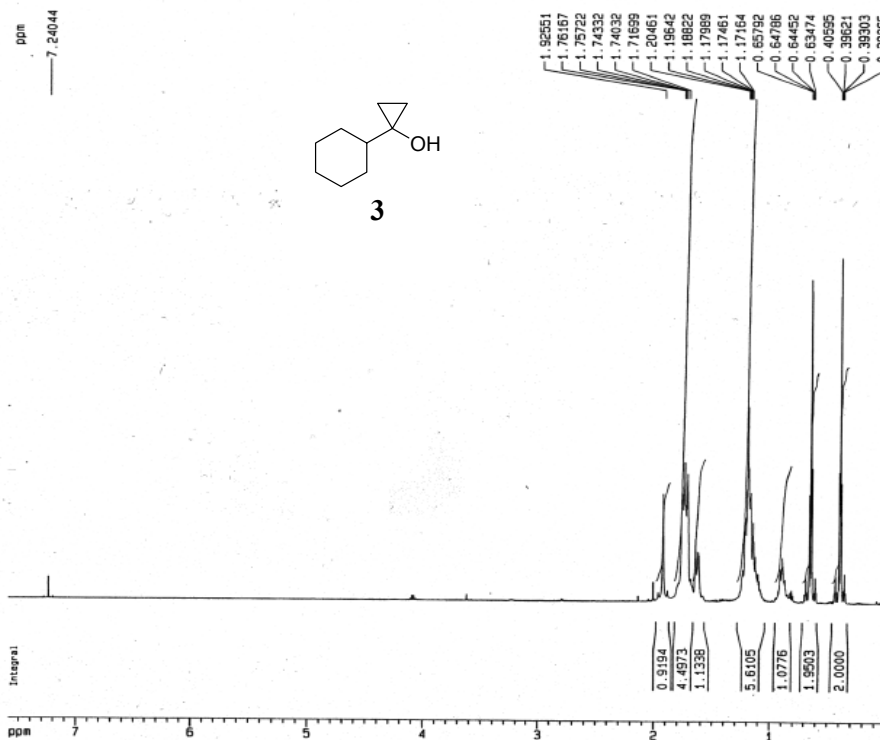

Current Data Parameters  
 NAME j062006  
 EXPNO 1  
 PROCNO 1

F2 - Acquisition Parameter  
 Date\_ 20060626  
 Time 11.36  
 INSTRUM spect  
 PROBHD 5 mm PHBBO BB-  
 PULPROG zg  
 TD 32768  
 SOLVENT CDC13  
 NS 8  
 DS 0  
 SMH 17985.611 Hz  
 FIDRES 0.548877 Hz  
 AQ 0.9110282 se  
 RG 28.5  
 DM 27.800 us  
 DE 7.00 us  
 TE 299.7 K  
 D1 1.0000000 se

----- CHANNEL f1 -----  
 NUC1 1H  
 P1 5.00 us  
 PL1 -4.00 dB  
 SFO1 500.1319002 MHz

F2 - Processing parameters  
 SI 32768  
 SF 500.1300233 MHz  
 MDW EM  
 SSB 0  
 LB 0.20 Hz  
 GB 0  
 PC 4.00

ID NMR plot parameters  
 CX 20.00 cm  
 CY 13.00 cm  
 F1P 7.586 pp  
 F1 3794.14 Hz  
 F2P -0.001 pp  
 F2 -0.54 Hz  
 PPMCM 0.37937 pp  
 HZCM 189.73425 Hz

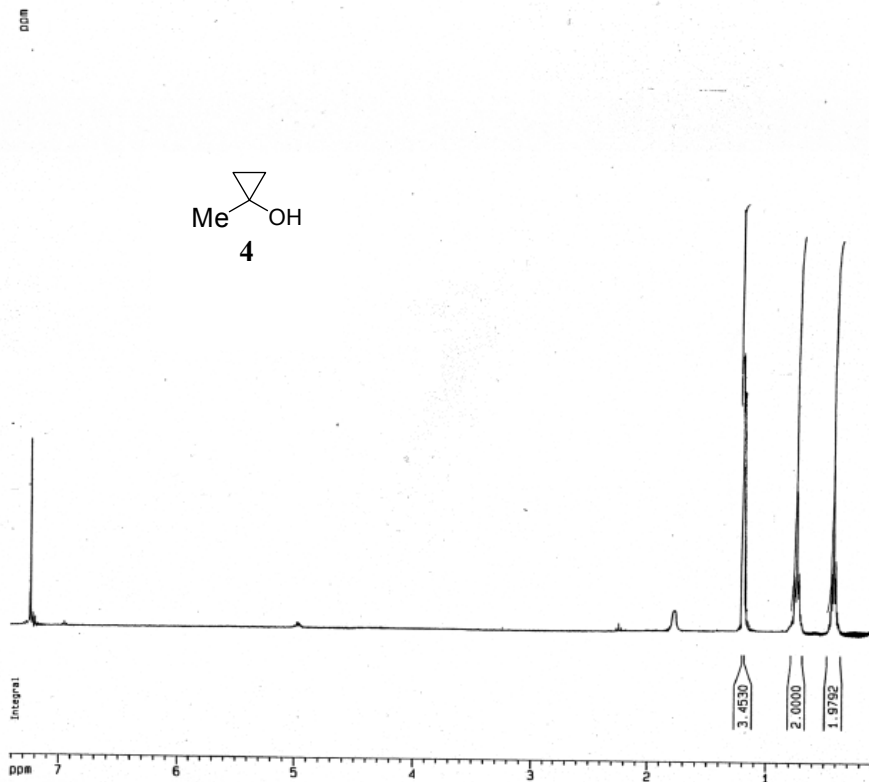

Current Data Parameters  
 NAME j072006  
 EXPNO 1  
 PROCNO 1

F2 - Acquisition Parameter  
 Date\_ 20060724  
 Time 15.17  
 INSTRUM spect  
 PROBHD 5 mm PHBBO BB-  
 PULPROG zg  
 TD 32768  
 SOLVENT CDC13  
 NS 8  
 DS 0  
 SMH 17985.611 Hz  
 FIDRES 0.548877 Hz  
 AQ 0.9110282 se  
 RG 114  
 DM 27.800 us  
 DE 7.00 us  
 TE 299.7 K  
 D1 1.0000000 se

----- CHANNEL f1 -----  
 NUC1 1H  
 P1 5.00 us  
 PL1 -4.00 dB  
 SFO1 500.1319002 MHz

F2 - Processing parameters  
 SI 32768  
 SF 500.1300233 MHz  
 MDW EM  
 SSB 0  
 LB 0.20 Hz  
 GB 0  
 PC 4.00

ID NMR plot parameters  
 CX 20.00 cm  
 CY 200.00 cm  
 F1P 7.410 pp  
 F1 3706.21 Hz  
 F2P 0.066 pp  
 F2 32.92 Hz  
 PPMCM 0.36723 pp  
 HZCM 183.66426 Hz



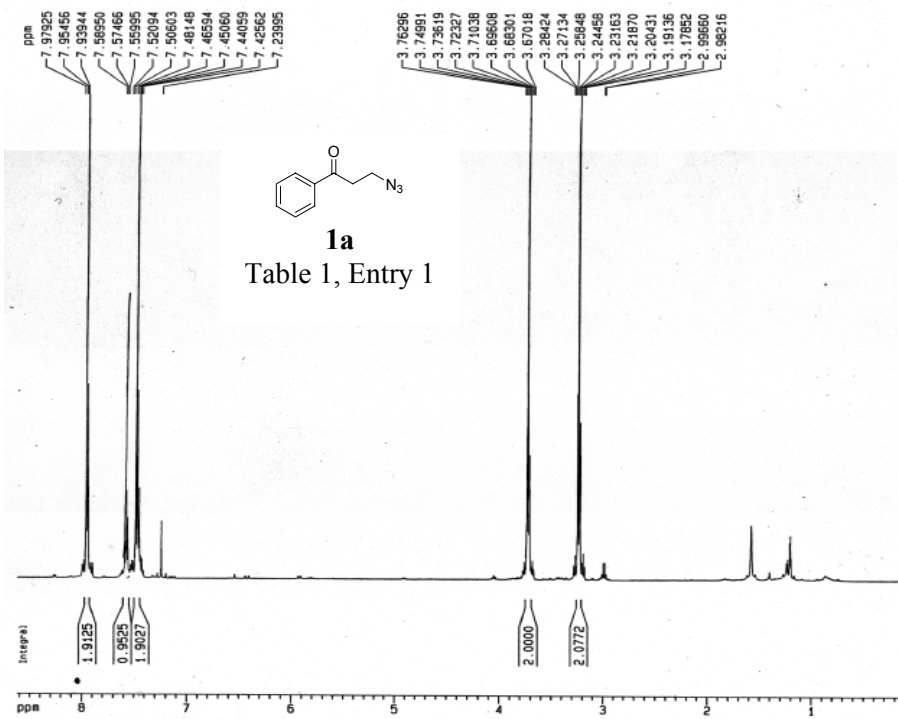

Current Data Parameters  
 NAME j061506  
 EXPNO 1  
 PROCNO 1

F2 - Acquisition Parameter  
 Date\_ 20060615  
 Time 10.22  
 INSTRUM spect  
 PROBHD 5 mm PHBBO BB-  
 PULPROG zg  
 TD 32768  
 SOLVENT CDC13  
 NS 8  
 DS 0  
 SWH 17985.611 Hz  
 FIDRES 0.548877 Hz  
 AQ 0.9110282 se  
 RG 181  
 DW 27.800 us  
 DE 7.00 us  
 TE 299.3 K  
 D1 1.00000000 se

===== CHANNEL f1 =====  
 NUC1 1H  
 P1 5.00 us  
 PL1 -4.00 dB  
 SFO1 500.1319002 MH

F2 - Processing parameters  
 SI 32768  
 SF 500.1300233 MH  
 WDW EM  
 SSB 0  
 LB 0.20 Hz  
 GB 0  
 PC 4.00

1D NMR plot parameters  
 CX 20.00 cm  
 CY 40.00 cm  
 F1P 8.622 pp  
 F1 4311.97 Hz  
 F2P 0.165 pp  
 F2 82.57 Hz  
 PPMCM 0.42283 pp  
 HZCM 211.46980 Hz

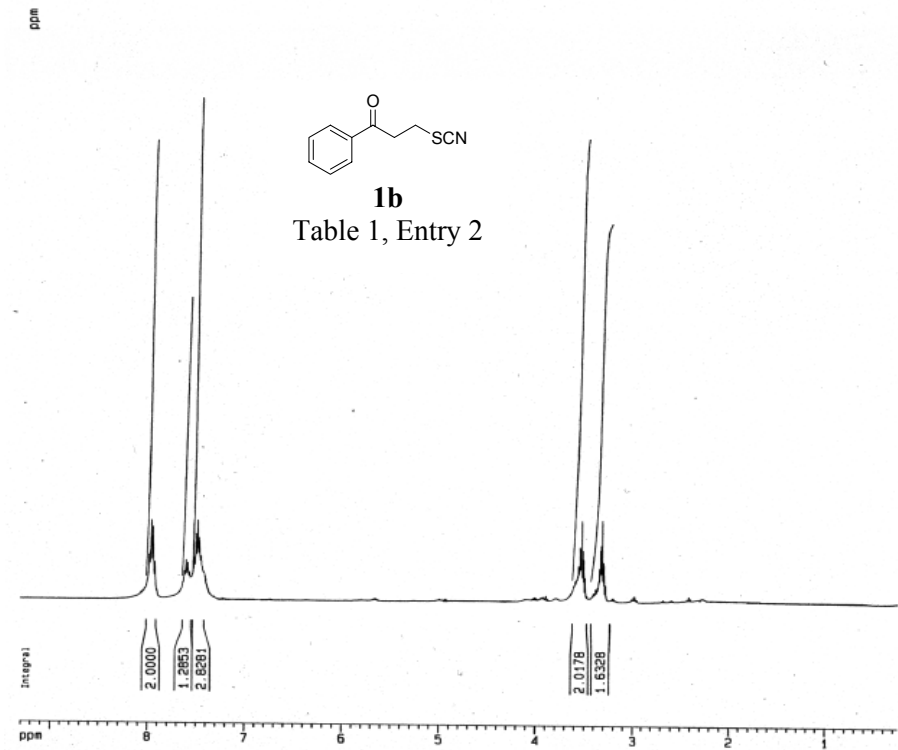

Current Data Parameters  
 NAME j072606  
 EXPNO 1  
 PROCNO 1

F2 - Acquisition Parameter  
 Date\_ 20060726  
 Time 14.25  
 INSTRUM spect  
 PROBHD 5 mm PHBBO BB-  
 PULPROG zg  
 TD 32768  
 SOLVENT CDC13  
 NS 8  
 DS 0  
 SWH 17985.611 Hz  
 FIDRES 0.548877 Hz  
 AQ 0.9110282 se  
 RG 64  
 DW 27.800 us  
 DE 7.00 us  
 TE 297.4 K  
 D1 1.00000000 se

===== CHANNEL f1 =====  
 NUC1 1H  
 P1 5.00 us  
 PL1 -4.00 dB  
 SFO1 500.1319002 MH

F2 - Processing parameters  
 SI 32768  
 SF 500.1300233 MH  
 WDW EM  
 SSB 0  
 LB 0.20 Hz  
 GB 0  
 PC 4.00

1D NMR plot parameters  
 CX 20.00 cm  
 CY 13.00 cm  
 F1P 9.305 pp  
 F1 4653.74 Hz  
 F2P 0.251 pp  
 F2 125.29 Hz  
 PPMCM 0.45273 pp  
 HZCM 226.42220 Hz

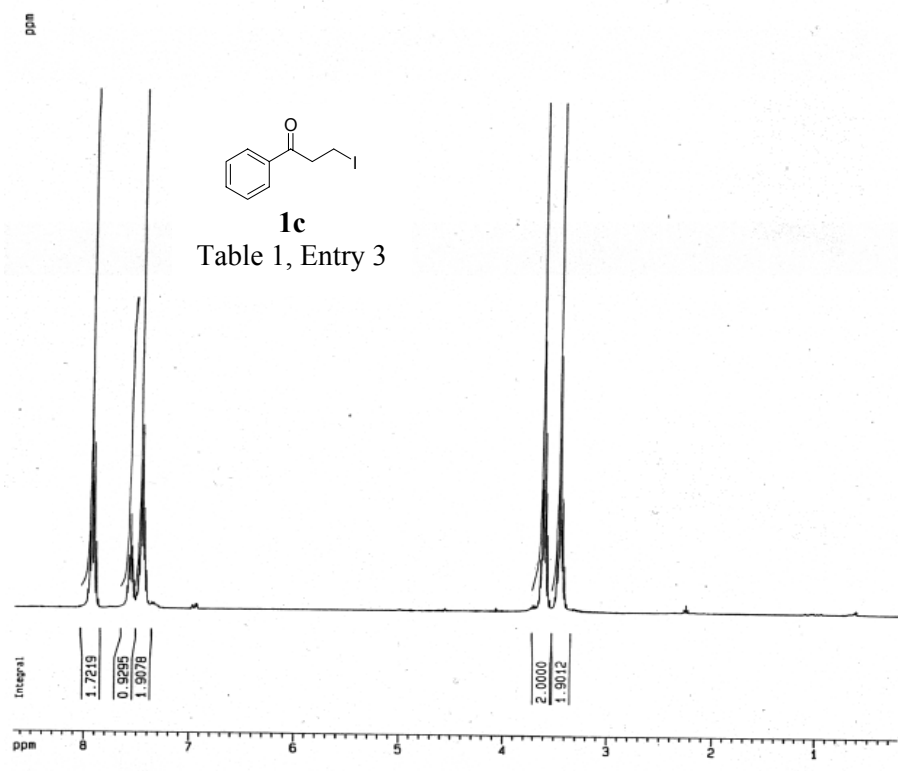

Current Data Parameters  
 NAME j07M006  
 EXPNO 3  
 PROCNO 1

F2 - Acquisition Parameter  
 Date\_ 20060710  
 Time 16.26  
 INSTRUM spect  
 PROBHD 5 mm PHBBO BB-  
 PULPROG zg  
 TD 32768  
 SOLVENT CDC13  
 NS 8  
 DS 0  
 SWH 17985.611 Hz  
 FIDRES 0.548877 Hz  
 AQ 0.9110282 se  
 RG 50.8  
 DW 27.800 us  
 DE 7.00 us  
 TE 299.4 K  
 D1 1.00000000 se

\*\*\*\*\* CHANNEL f1 \*\*\*\*\*  
 NUC1 1H  
 P1 5.00 us  
 PL1 -4.00 dB  
 SF01 500.1319002 MH

F2 - Processing parameters  
 SI 32768  
 SF 500.1300233 MH  
 WDW EM  
 SSB 0  
 LB 0.20 Hz  
 GB 0  
 PC 4.00

1D NMR plot parameters  
 CX 20.00 cm  
 CY 13.00 cm  
 F1P 8.664 pp  
 F1 4333.33 Hz  
 F2P 0.208 pp  
 F2 103.93 Hz  
 PPMCM 0.42283 pp  
 HZCM 211.46980 Hz

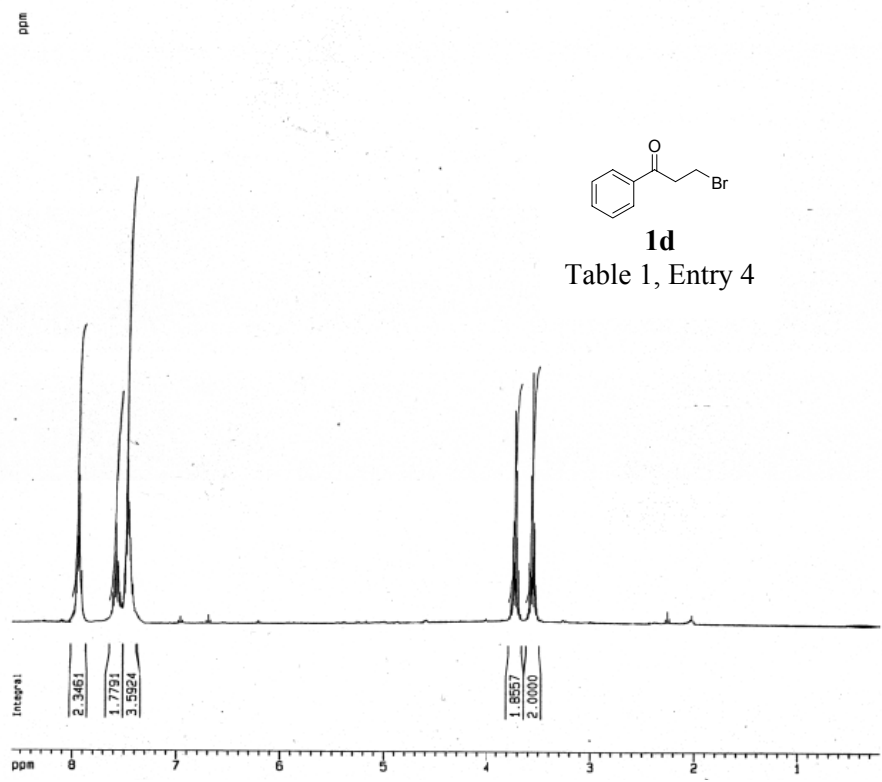

Current Data Parameters  
 NAME j07M006  
 EXPNO 2  
 PROCNO 1

F2 - Acquisition Parameter  
 Date\_ 20060724  
 Time 15.27  
 INSTRUM spect  
 PROBHD 5 mm PHBBO BB-  
 PULPROG zg  
 TD 32768  
 SOLVENT CDC13  
 NS 8  
 DS 0  
 SWH 17985.611 Hz  
 FIDRES 0.548877 Hz  
 AQ 0.9110282 se  
 RG 50.8  
 DW 27.800 us  
 DE 7.00 us  
 TE 299.5 K  
 D1 1.00000000 se

\*\*\*\*\* CHANNEL f1 \*\*\*\*\*  
 NUC1 1H  
 P1 5.00 us  
 PL1 -4.00 dB  
 SF01 500.1319002 MH

F2 - Processing parameters  
 SI 32768  
 SF 500.1300233 MH  
 WDW EM  
 SSB 0  
 LB 0.20 Hz  
 GB 0  
 PC 4.00

1D NMR plot parameters  
 CX 20.00 cm  
 CY 40.00 cm  
 F1P 8.579 pp  
 F1 4290.61 Hz  
 F2P 0.208 pp  
 F2 103.93 Hz  
 PPMCM 0.41856 pp  
 HZCM 209.33372 Hz

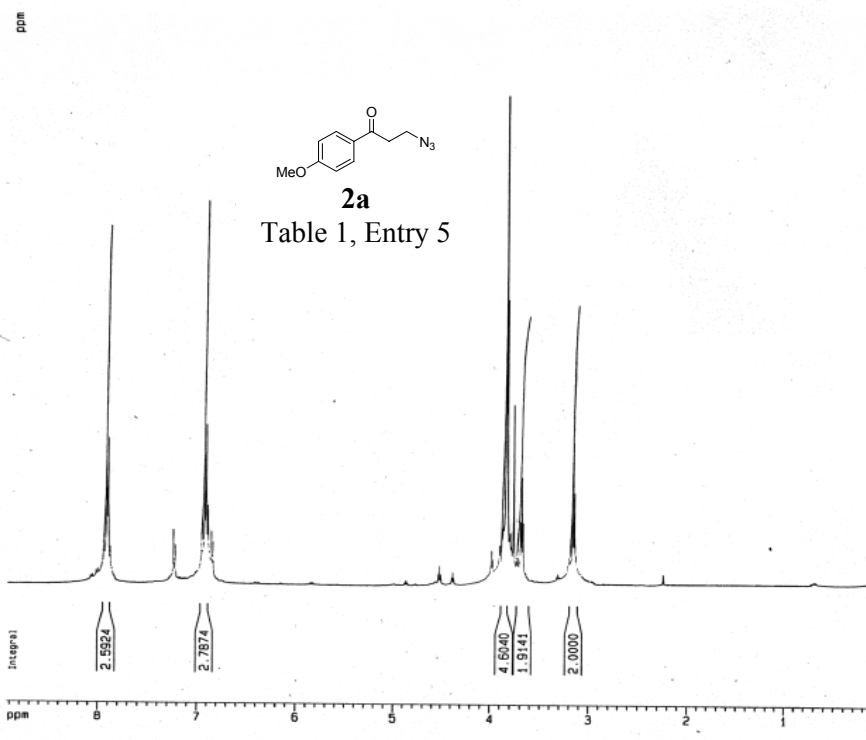

Current Data Parameters  
 NAME j061906  
 EXPNO 2  
 PROCNO 1

F2 - Acquisition Parameter  
 Date\_ 20060619  
 Time 16.00  
 INSTRUM spect  
 PROBHD 5 mm PH80 BB-  
 PULPROG zg  
 TD 32768  
 SOLVENT CDC13  
 NS 8  
 DS 0  
 SMH 17985.611 Hz  
 FIDRES 0.548877 Hz  
 AQ 0.9110282 se  
 RG 28.5  
 DW 27.800 us  
 DE 7.00 us  
 TE 298.9 K  
 D1 1.00000000 se

\*\*\*\*\* CHANNEL f1 \*\*\*\*\*  
 NUC1 1H  
 P1 5.00 us  
 PL1 -4.00 dB  
 SF01 500.1319002 MH

F2 - Processing parameters  
 SI 32768  
 SF 500.1300233 MH  
 WDW EM  
 SSB 0  
 LB 0.20 Hz  
 GB 0  
 PC 4.00

1D NMR plot parameters  
 CX 20.00 cm  
 CY 13.00 cm  
 F1P 8.921 pp  
 F1 4461.49 Hz  
 F2P 0.165 pp  
 F2 82.57 Hz  
 PPMCM 0.43778 pp  
 HZCM 218.94600 Hz

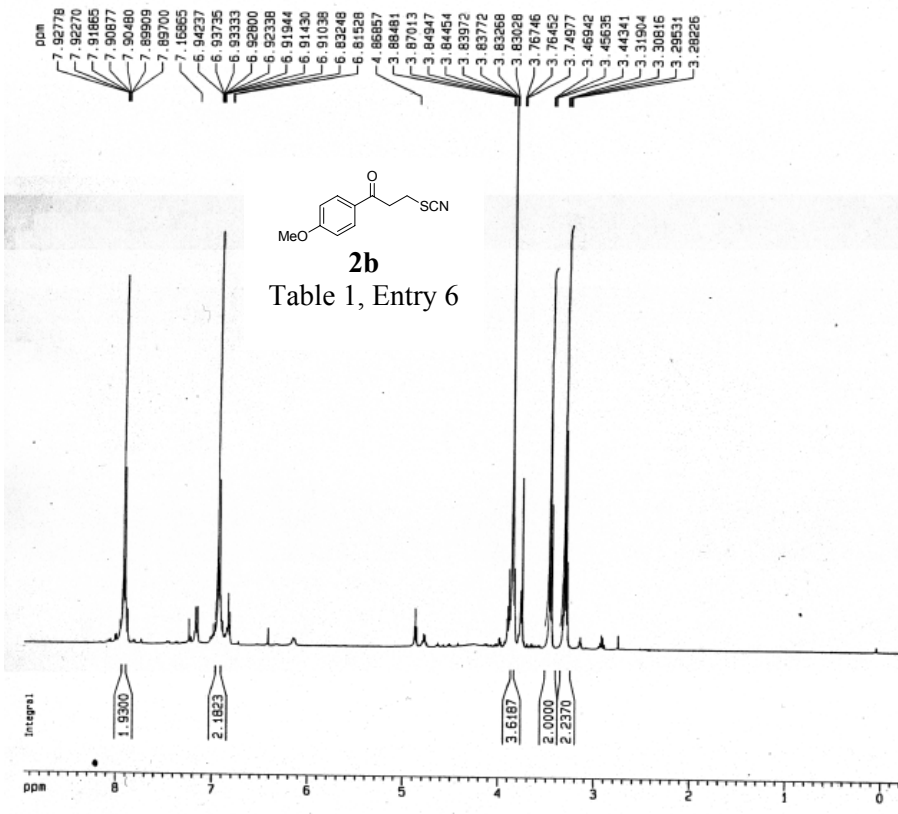

Current Data Parameters  
 NAME j073106  
 EXPNO 3  
 PROCNO 1

F2 - Acquisition Parameter  
 Date\_ 20060731  
 Time 15.54  
 INSTRUM spect  
 PROBHD 5 mm PH80 BB-  
 PULPROG zg  
 TD 32768  
 SOLVENT CDC13  
 NS 8  
 DS 0  
 SMH 17985.611 Hz  
 FIDRES 0.548877 Hz  
 AQ 0.9110282 se  
 RG 45.3  
 DW 27.800 us  
 DE 7.00 us  
 TE 299.7 K  
 D1 1.00000000 se

\*\*\*\*\* CHANNEL f1 \*\*\*\*\*  
 NUC1 1H  
 P1 5.00 us  
 PL1 -4.00 dB  
 SF01 500.1319002 MH

F2 - Processing parameters  
 SI 32768  
 SF 500.1300233 MH  
 WDW EM  
 SSB 0  
 LB 0.20 Hz  
 GB 0  
 PC 4.00

1D NMR plot parameters  
 CX 20.00 cm  
 CY 20.00 cm  
 F1P 8.963 pp  
 F1 4482.85 Hz  
 F2P -0.219 pp  
 F2 -109.67 Hz  
 PPMCM 0.45913 pp  
 HZCM 229.62628 Hz

ppm

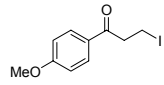

**2c**

Table 1, Entry 7

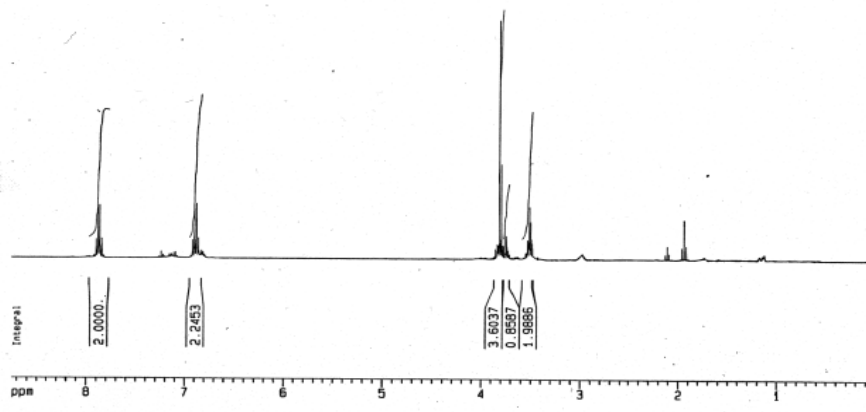

Current Data Parameters  
 NAME 1071306  
 EXPNO 2  
 PROCNO 1

F2 - Acquisition Parameter  
 Date\_ 20060713  
 Time 17.03  
 INSTRUM spect  
 PROBHD 5 mm PH80 BB-  
 PULPROG zg  
 TD 32768  
 SOLVENT CDC13  
 NS 8  
 DS 0  
 SMH 17985.611 Hz  
 FIDRES 0.548877 Hz  
 AQ 0.9110282 se  
 RG 28.5  
 DW 27.800 us  
 DE 7.00 us  
 TE 300.0 K  
 D1 1.00000000 se

----- CHANNEL f1 -----  
 NUC1 1H  
 P1 5.00 us  
 PL1 -4.00 dB  
 SFO1 500.1319002 MHz

F2 - Processing parameters  
 SI 32768  
 SF 500.1300233 MHz  
 WDW EM  
 SSB 0  
 LB 0.20 Hz  
 GB 0  
 PC 4.00

1D NMR plot parameters  
 CX 20.00 cm  
 CY 13.00 cm  
 F1P 8.750 pp  
 F1 4376.05 Hz  
 F2P 0.080 pp  
 F2 39.85 Hz  
 PPMCM 0.43351 pp  
 HZCM 216.80992 Hz

ppm

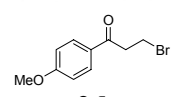

**2d**

Table 1, Entry 8

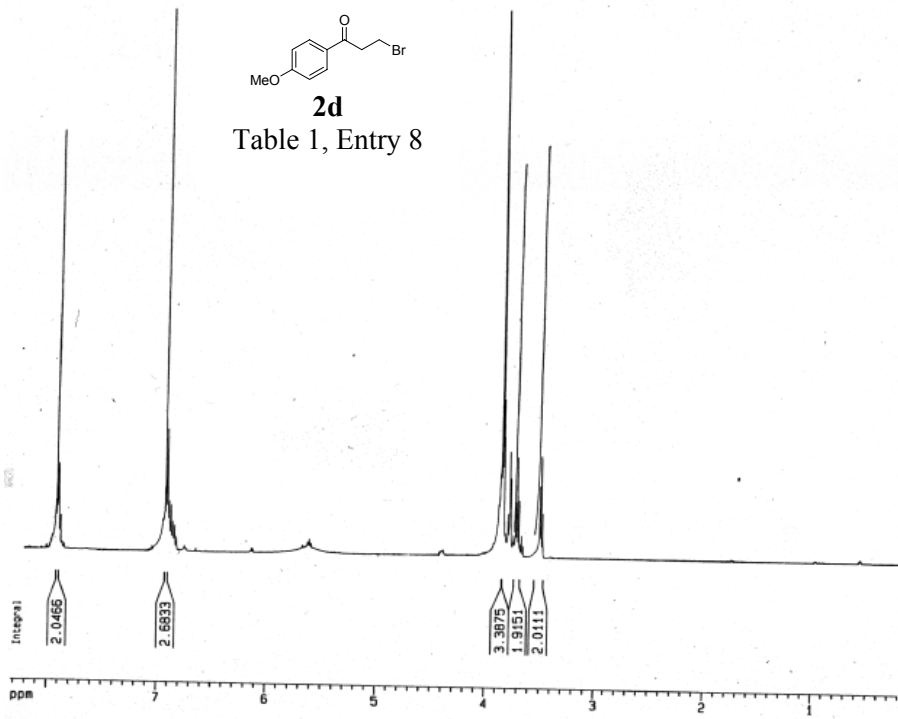

Current Data Parameters  
 NAME 1072806  
 EXPNO 3  
 PROCNO 1

F2 - Acquisition Parameter  
 Date\_ 20060728  
 Time 16.16  
 INSTRUM spect  
 PROBHD 5 mm PH80 BB-  
 PULPROG zg  
 TD 32768  
 SOLVENT CDC13  
 NS 8  
 DS 0  
 SMH 17985.611 Hz  
 FIDRES 0.548877 Hz  
 AQ 0.9110282 se  
 RG 50.8  
 DW 27.800 us  
 DE 7.00 us  
 TE 299.7 K  
 D1 1.00000000 se

----- CHANNEL f1 -----  
 NUC1 1H  
 P1 5.00 us  
 PL1 -4.00 dB  
 SFO1 500.1319002 MHz

F2 - Processing parameters  
 SI 32768  
 SF 500.1300233 MHz  
 WDW EM  
 SSB 0  
 LB 0.20 Hz  
 GB 0  
 PC 4.00

1D NMR plot parameters  
 CX 20.00 cm  
 CY 13.00 cm  
 F1P 8.320 pp  
 F1 4161.10 Hz  
 F2P 0.200 pp  
 F2 99.82 Hz  
 PPMCM 0.40602 pp  
 HZCM 203.06383 Hz

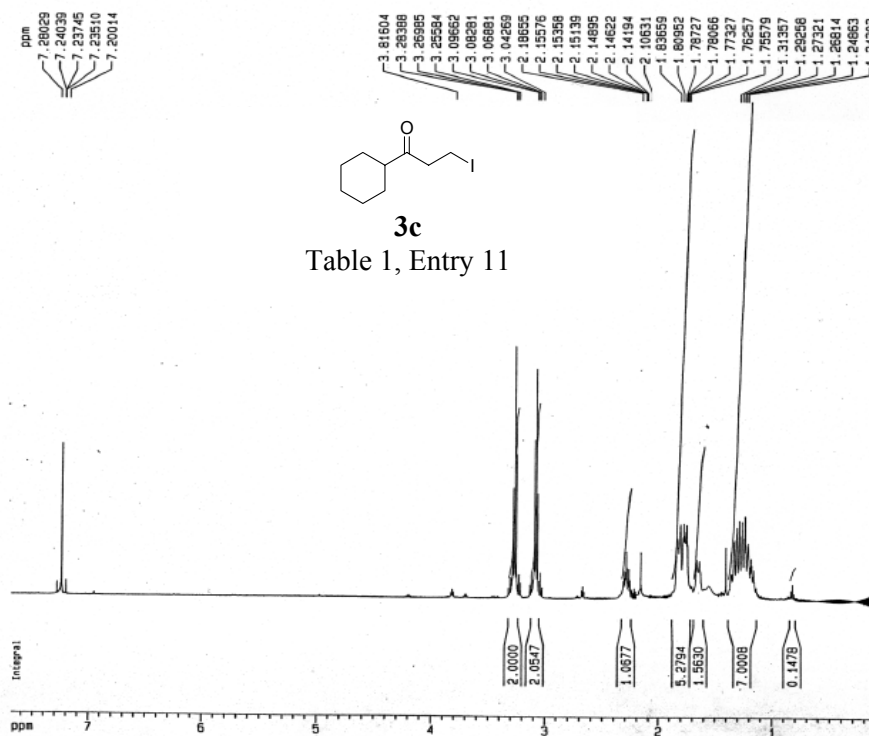

Current Data Parameters  
NAME j070706  
EXPNO 1  
PROCNO 1

F2 - Acquisition Parameter  
Date\_ 20060707  
Time 16.08  
INSTRUM spect  
PROBHD 5 mm PH80 BB-  
PULPROG zg  
TD 32768  
SOLVENT CDC13  
NS 8  
DS 0  
SMH 17985.611 Hz  
FIDRES 0.548877 Hz  
AQ 0.9110282 se  
RG 114  
DW 27.800 us  
DE 7.00 us  
TE 302.1 K  
D1 1.0000000 se

----- CHANNEL f1 -----  
NUC1 1H  
P1 5.00 us  
PL1 -4.00 dB  
SFO1 500.1319002 MHz

F2 - Processing parameters  
SI 32768  
SF 500.1300233 MHz  
WDW EM  
SSB 0  
LB 0.20 Hz  
GB 0  
PC 4.00

1D NMR plot parameters  
CX 20.00 cm  
CY 160.00 cm  
F1P 7.682 pp  
F1 3842.03 Hz  
F2P 0.122 pp  
F2 61.21 Hz  
PPMCM 0.3798 pp  
HZCM 189.04117 Hz

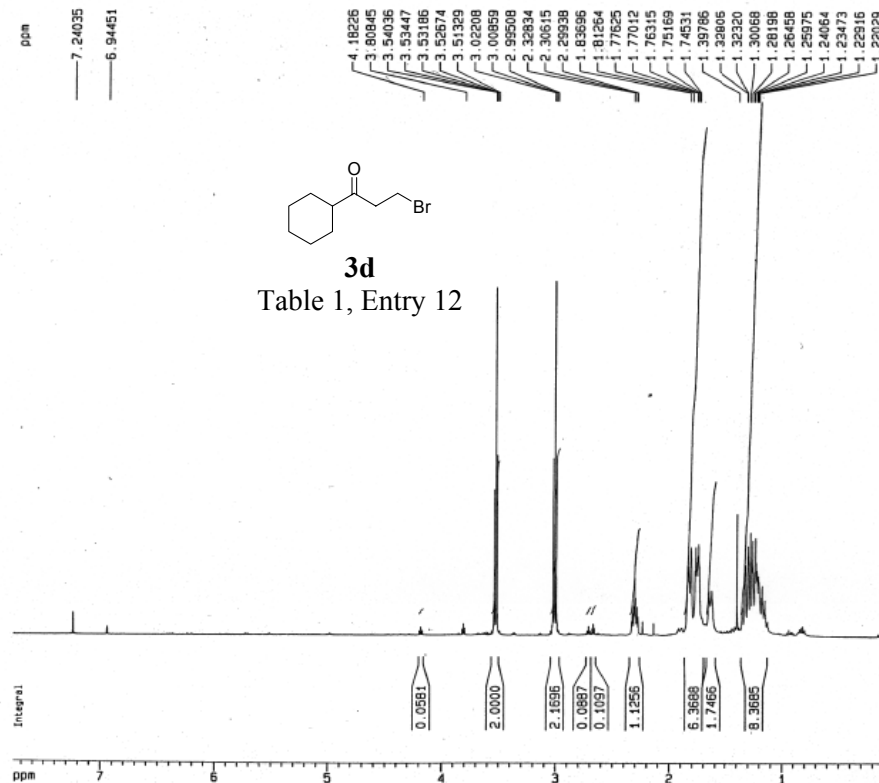

Current Data Parameters  
NAME j072706  
EXPNO 1  
PROCNO 1

F2 - Acquisition Parameter  
Date\_ 20060727  
Time 10.29  
INSTRUM spect  
PROBHD 5 mm PH80 BB-  
PULPROG zg  
TD 32768  
SOLVENT CDC13  
NS 8  
DS 0  
SMH 17985.611 Hz  
FIDRES 0.548877 Hz  
AQ 0.9110282 se  
RG 50.8  
DW 27.800 us  
DE 7.00 us  
TE 297.3 K  
D1 1.0000000 se

----- CHANNEL f1 -----  
NUC1 1H  
P1 5.00 us  
PL1 -4.00 dB  
SFO1 500.1319002 MHz

F2 - Processing parameters  
SI 32768  
SF 500.1300233 MHz  
WDW EM  
SSB 0  
LB 0.20 Hz  
GB 0  
PC 4.00

1D NMR plot parameters  
CX 20.00 cm  
CY 13.00 cm  
F1P 7.767 pp  
F1 3884.75 Hz  
F2P 0.122 pp  
F2 61.21 Hz  
PPMCM 0.38226 pp  
HZCM 191.17722 Hz

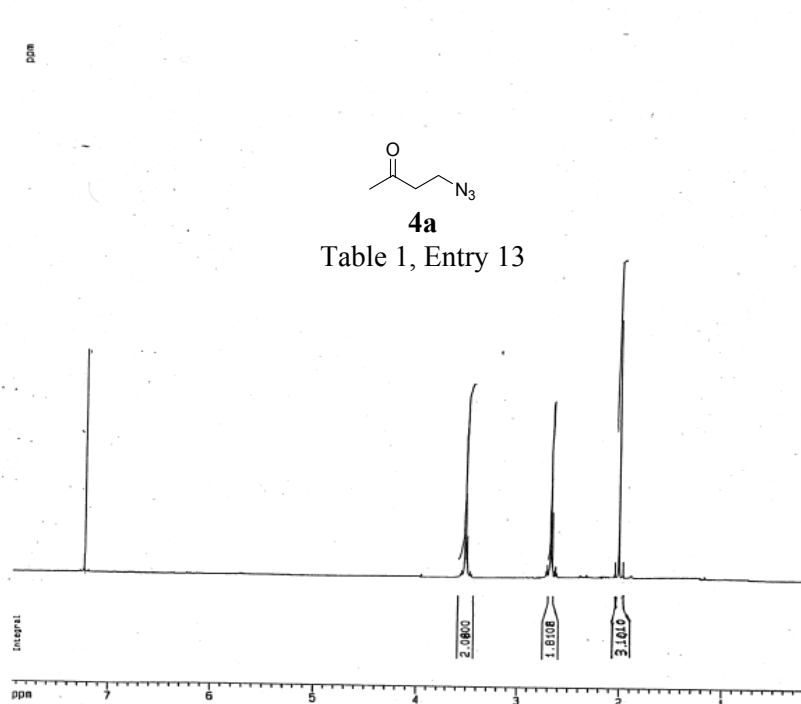

```

Current Data Parameters
NAME      j063006
EXPNO    1
PROCNO   1

F2 - Acquisition Parameter
Date_    20060630
Time     15.27
INSTRUM spect
PROBHD   5 mm PH800 BB-
PULPROG zg
TD       32768
SOLVENT  CDC13
NS       8
DS       0
SWH      17985.611 Hz
FIDRES   0.548877 Hz
AQ       0.9110282 se
RG       45.3
DM       27.800 us
DE       7.00 us
TE       299.5 K
D1       1.00000000 se

----- CHANNEL f1 -----
NUC1     1H
P1       5.00 us
PL1     -4.00 dB
SFO1    500.1319002 MHz

F2 - Processing parameters
SI       32768
SF       500.1300233 MHz
WDW      EM
SSB      0
LB       0.20 Hz
GB       0
PC       4.00

1D NMR plot parameters
CX       20.00 cm
CY       13.00 cm
F1P      7.938 pp
F1       3970.20 Hz
F2P      0.208 pp
F2       103.93 Hz
PPMCH    0.38653 pp
HZCH     193.31329 Hz
  
```

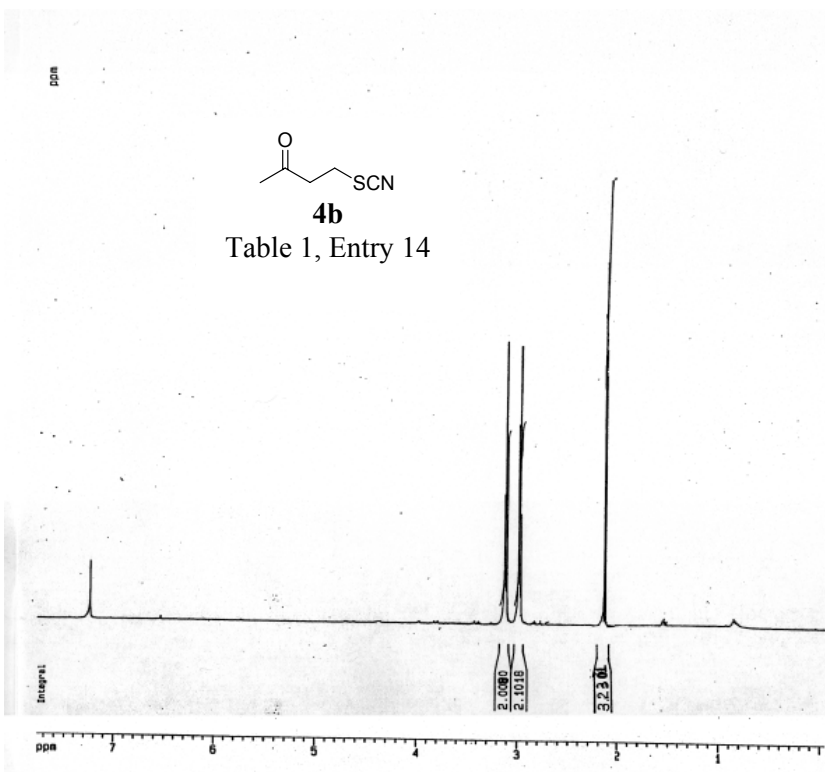

```

Current Data Parameters
NAME      j073106
EXPNO    6
PROCNO   1

F2 - Acquisition Parameter
Date_    20060731
Time     16.47
INSTRUM spect
PROBHD   5 mm PH800 BB-
PULPROG zg
TD       32768
SOLVENT  CDC13
NS       8
DS       0
SWH      17985.611 Hz
FIDRES   0.548877 Hz
AQ       0.9110282 se
RG       28.1
DM       27.800 us
DE       7.00 us
TE       299.8 K
D1       1.00000000 se

----- CHANNEL f1 -----
NUC1     1H
P1       5.00 us
PL1     -4.00 dB
SFO1    500.1319002 MHz

F2 - Processing parameters
SI       32768
SF       500.1300233 MHz
WDW      EM
SSB      0
LB       0.20 Hz
GB       0
PC       4.00

1D NMR plot parameters
CX       20.00 cm
CY       8.00 cm
F1P      7.767 pp
F1       3884.76 Hz
F2P     -0.048 pp
F2       -24.23 Hz
PPMCH    0.39080 pp
HZCH     195.44934 Hz
  
```

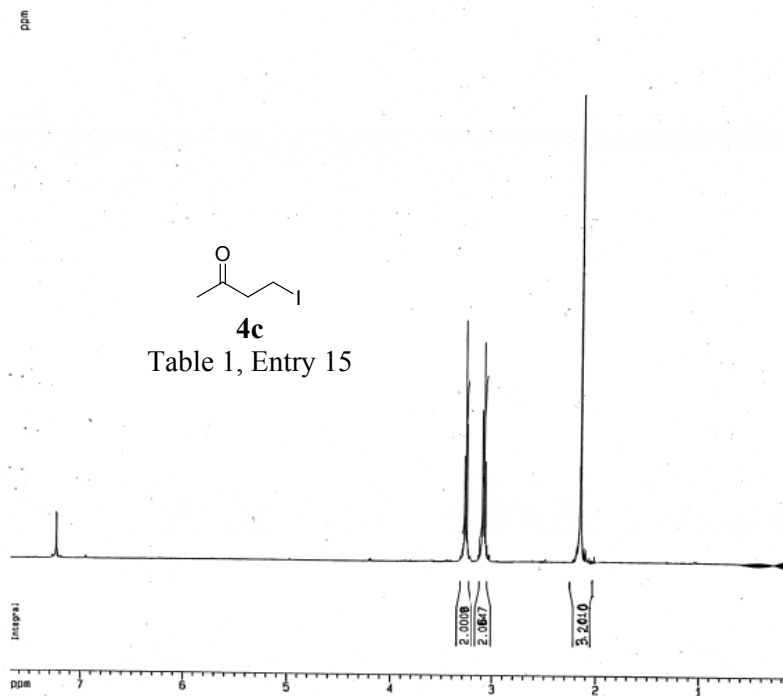

Current Data Parameters  
 NAME 1070806  
 EXPNO 1  
 PROCNO 1

F2 - Acquisition Parameter  
 Date\_ 20060707  
 Time 16.08  
 INSTRUM spect  
 PROBHD 5 mm PHEB0 BB-  
 PULPROG zg  
 TD 32768  
 SOLVENT CDC13  
 NS 8  
 DS 0  
 SWH 17985.611 Hz  
 FIDRES 0.548877 Hz  
 AQ 0.9110262 se  
 RG 114  
 DW 27.800 us  
 DE 7.00 us  
 TE 362.1 K  
 D1 1.0000000 se

\*\*\*\*\* CHANNEL f1 \*\*\*\*\*  
 NUC1 1H  
 P1 5.00 us  
 PL1 -4.00 dB  
 SF01 500.1319002 MHz

F2 - Processing parameters  
 SI 32768  
 SF 500.1300233 MHz  
 MDW EM  
 SSB 0  
 LB 0.20 Hz  
 GB 0  
 PC 4.00

1D NMR plot parameters  
 CX 20.00 cm  
 CY 160.00 cm  
 F1P 7.682 pp  
 F1 3842.93 Hz  
 F2P 0.122 pp  
 F2 61.21 Hz  
 PPMCM 0.37798 pp  
 HZCM 189.04117 Hz

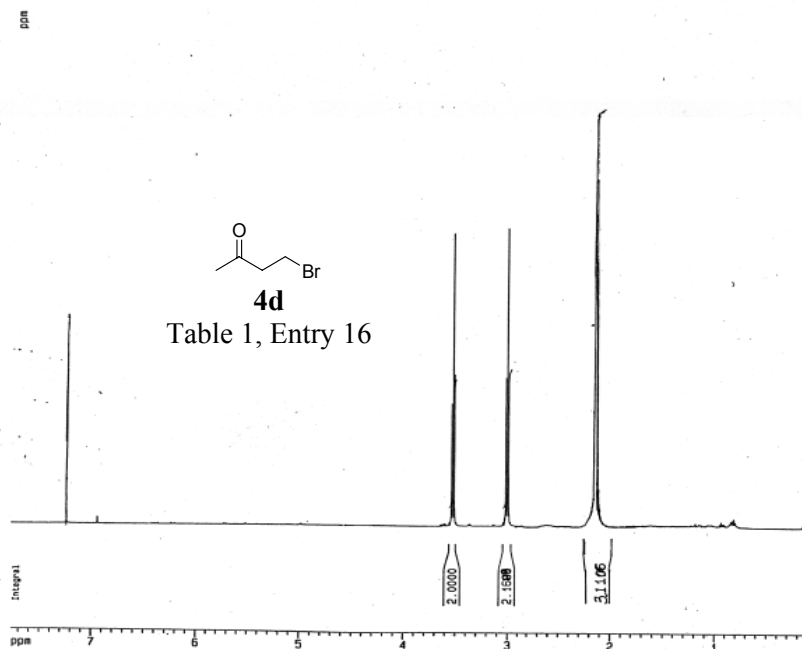

Current Data Parameters  
 NAME 1072806  
 EXPNO 1  
 PROCNO 1

F2 - Acquisition Parameter  
 Date\_ 20060727  
 Time 10.29  
 INSTRUM spect  
 PROBHD 5 mm PHEB0 BB-  
 PULPROG zg  
 TD 32768  
 SOLVENT CDC13  
 NS 8  
 DS 0  
 SWH 17985.611 Hz  
 FIDRES 0.548877 Hz  
 AQ 0.9110262 se  
 RG 50.8  
 DW 27.800 us  
 DE 7.00 us  
 TE 297.3 K  
 D1 1.0000000 se

\*\*\*\*\* CHANNEL f1 \*\*\*\*\*  
 NUC1 1H  
 P1 5.00 us  
 PL1 -4.00 dB  
 SF01 500.1319002 MHz

F2 - Processing parameters  
 SI 32768  
 SF 500.1300233 MHz  
 MDW EM  
 SSB 0  
 LB 0.20 Hz  
 GB 0  
 PC 4.00

1D NMR plot parameters  
 CX 20.00 cm  
 CY 13.00 cm  
 F1P 7.767 pp  
 F1 3884.75 Hz  
 F2P 0.122 pp  
 F2 61.21 Hz  
 PPMCM 0.38225 pp  
 HZCM 191.17722 Hz

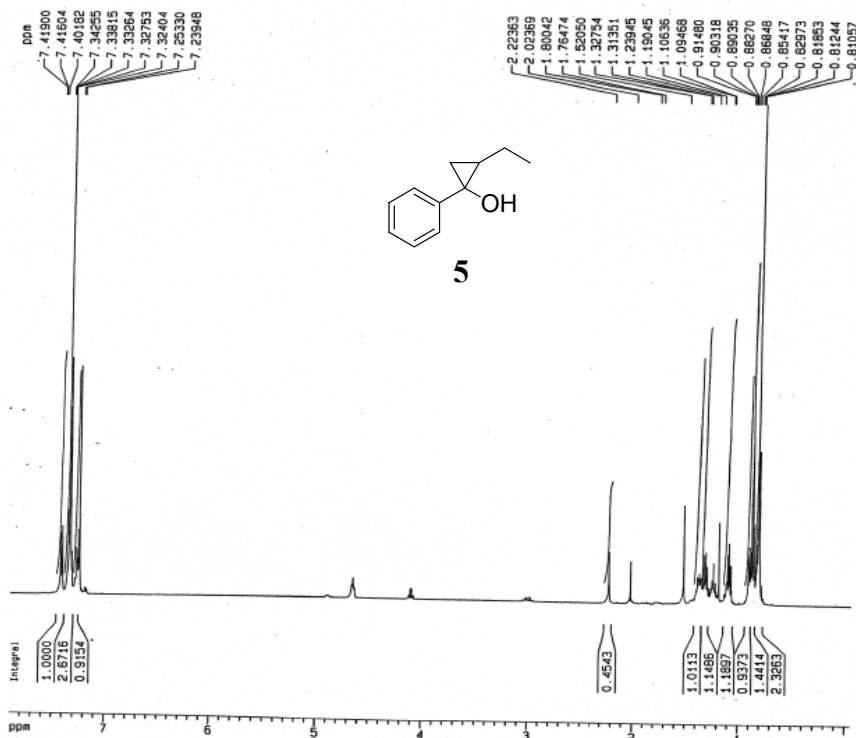

Current Data Parameters  
 NAME j073106  
 EXPNO 1  
 PROCNO 1

F2 - Acquisition Parameter  
 Date\_ 20060731  
 Time 10.09  
 INSTRUM spect  
 PROBHD 5 mm PHBBO BB-  
 PULPROG zg  
 TD 32768  
 SOLVENT CDC13  
 NS 8  
 DS 0  
 SWH 17985.611 Hz  
 FIDRES 0.548877 Hz  
 AQ 0.9110282 se  
 RG 256  
 DW 27.800 us  
 DE 7.00 us  
 TE 300.0 K  
 D1 1.00000000 se

\*\*\*\*\* CHANNEL f1 \*\*\*\*\*  
 NUC1 1H  
 P1 5.00 us  
 PL1 -4.00 dB  
 SFO1 500.1319002 MH

F2 - Processing parameters  
 SI 32768  
 SF 500.1300233 MH  
 WDW EM  
 SSB 0  
 LB 0.20 Hz  
 GB 0  
 PC 4.00

1D NMR plot parameters  
 CX 20.00 cm  
 CY 6.00 cm  
 F1P 7.896 pp  
 F1 3948.64 Hz  
 F2P -0.048 pp  
 F2 -24.23 Hz  
 PPMCM 0.39720 pp  
 HZCM 198.65346 Hz

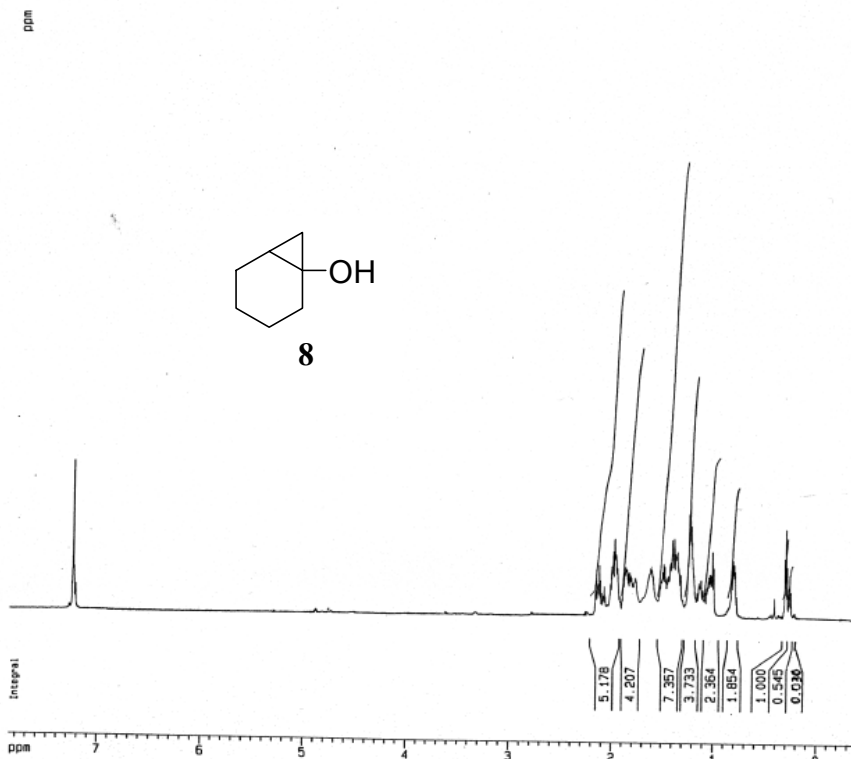

Current Data Parameters  
 NAME j121106  
 EXPNO 2  
 PROCNO 1

F2 - Acquisition Parameter  
 Date\_ 20061211  
 Time 14.45  
 INSTRUM spect  
 PROBHD 5 mm PHBBO BB-  
 PULPROG zg  
 TD 32768  
 SOLVENT CDC13  
 NS 8  
 DS 0  
 SWH 17985.611 Hz  
 FIDRES 0.548877 Hz  
 AQ 0.9110282 se  
 RG 161.3  
 DW 27.800 us  
 DE 7.00 us  
 TE 300.0 K  
 D1 1.00000000 se

\*\*\*\*\* CHANNEL f1 \*\*\*\*\*  
 NUC1 1H  
 P1 5.00 us  
 PL1 -4.00 dB  
 SFO1 500.1319002 MH

F2 - Processing parameters  
 SI 32768  
 SF 500.1300233 MH  
 WDW EM  
 SSB 0  
 LB 0.20 Hz  
 GB 0  
 PC 4.00

1D NMR plot parameters  
 CX 20.00 cm  
 CY 50.00 cm  
 F1P 7.853 pp  
 F1 3927.48 Hz  
 F2P -0.390 pp  
 F2 -195.12 Hz  
 PPMCM 0.41215 pp  
 HZCM 206.12964 Hz



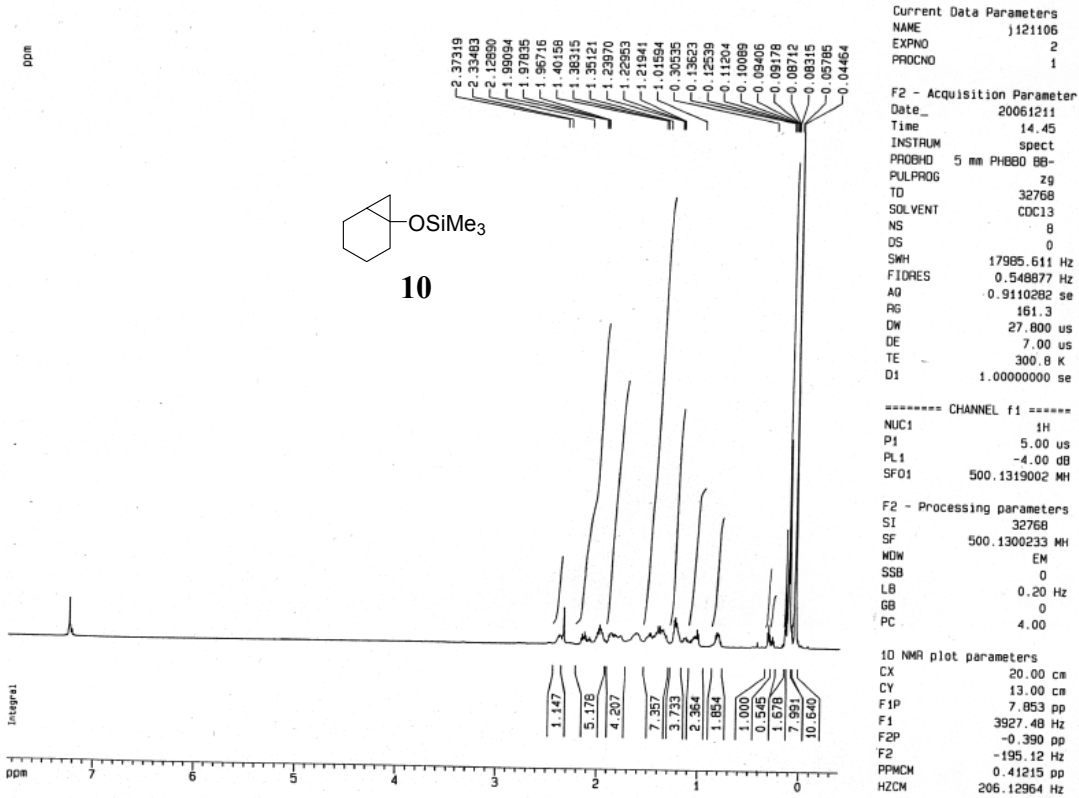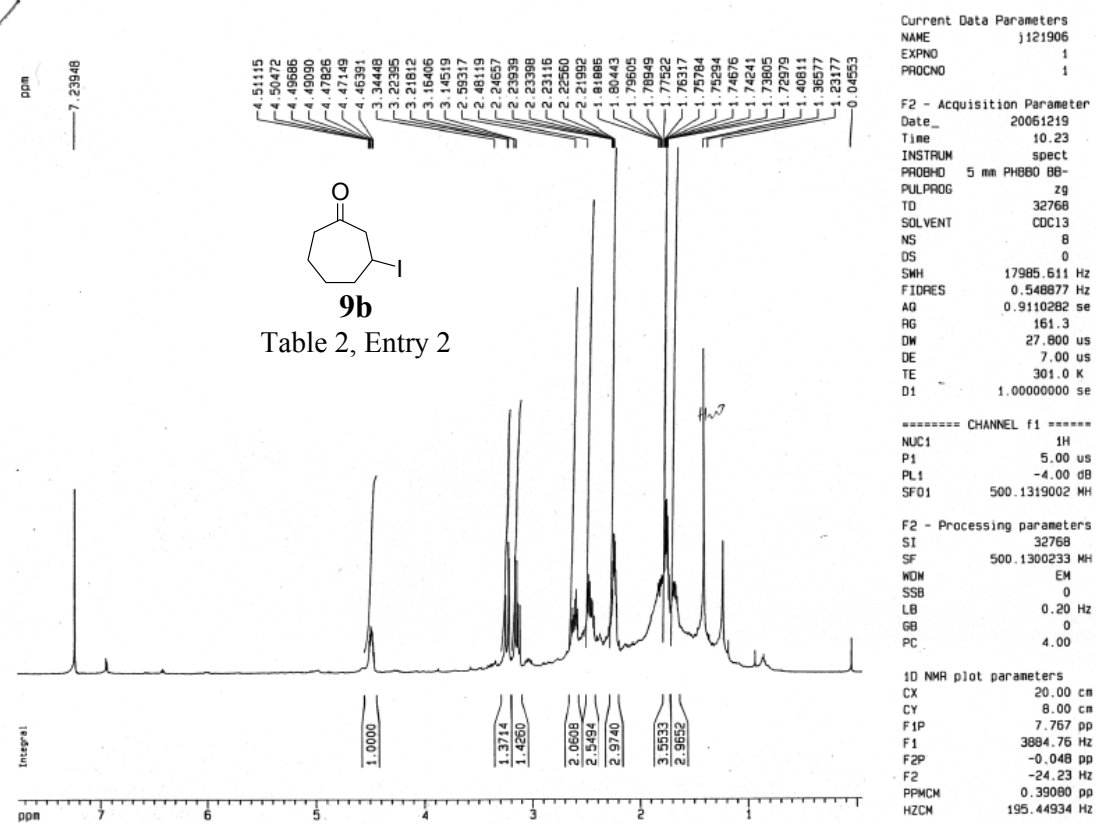

Supplement: NIHMS61997-supplement-si20070219_013.pdf [file NIHMS61997-supplement-si20070219_013.pdf]
